# Supplementary material for: A high activity mesoporous Pt@KIT-6 nanocomposite for selective hydrogenation of halogenated nitroarenes in a continuous-flow microreactor
Source: Royal Society of Chemistry journal article supplement (doi:10.1039/d3na00437f), 2023-01-01
Supplement: d3na00437f1.pdf [file d3na00437f1.pdf]

## Supporting Information

### High Activity Mesoporous Pt@KIT-6 Nanocomposite for Selective Hydrogenation of Halogenated Nitroarenes in Continuous-flow Microreactor

Kejie Chai <sup>a</sup>, Xilin Yang <sup>a</sup>, Runqiu Shen <sup>a</sup>, Jianli Chen <sup>a,b</sup>, Weike Su <sup>a,\*</sup>, An Su <sup>c,\*</sup>

<sup>a</sup> Key Laboratory of Pharmaceutical Engineering of Zhejiang Province, National Engineering Research Center for Process Development of Active Pharmaceutical Ingredients, Collaborative Innovation Center of Yangtze River Delta Region Green Pharmaceuticals, Zhejiang University of Technology, Hangzhou, 310014, P. R. China

<sup>b</sup> College of New Materials Engineering, Jiaxing Nanhu University, Jiaxing, 314000, P. R. China

<sup>c</sup> College of Chemical Engineering, Zhejiang University of Technology, Hangzhou 310014, P. R. China

#### Corresponding Authors:

Prof. An Su

College of Chemical Engineering, Zhejiang University of Technology, Hangzhou 310014, P. R. China

Email: [ansu@zjut.edu.cn](mailto:ansu@zjut.edu.cn)

Prof. Weike Su

Key Laboratory of Pharmaceutical Engineering of Zhejiang Province, National Engineering Research Center for Process Development of Active Pharmaceutical Ingredients, Collaborative Innovation Center of Yangtze River Delta Region Green Pharmaceuticals, Zhejiang University of Technology, Hangzhou, 310014, P. R. China

Email: [pharmlab@zjut.edu.cn](mailto:pharmlab@zjut.edu.cn)

Table S1. The content of Pt investigated by ICP-OES/MS.

| Entry | ICP-OES                         | ICP-OES                                 | ICP-MS                               |
|-------|---------------------------------|-----------------------------------------|--------------------------------------|
|       | Pristine Pt@KIT-6 nanocomposite | Running 24 hours Pt@KIT-6 nanocomposite | Operation 24 hours Reaction solution |
| Pt    | $5.06 \pm 0.01\%$ (w/w)         | $5.05 \pm 0.01\%$ (w/w)                 | trace                                |

Table S2. Comparison of the 4-nitrobromobenzene conversion and the 4-bromoaniline selectivity for Pt@KIT-6 nanocomposite in our study and some catalysts reported in the literature with the optimized conditions.

| Catalyst                          | H <sub>2</sub> Pres. (MPa) | Temp. (°C) | Time (min) | Conv. (%) | Selec. (%) | Stability (h) | Reference |
|-----------------------------------|----------------------------|------------|------------|-----------|------------|---------------|-----------|
| Pt@KIT-6 nanocomposite            | 1.0                        | 20         | 5          | > 99      | > 99       | 72            | This work |
| Pt/NOMC                           | 1.0                        | 25         | 30         | > 99      | 95.5       | 5             | 1         |
| Pt/C                              | 0.1                        | 80         | 10         | > 99      | 87.9       | -             | 2         |
| Pt@PNIPAM-SH                      | 1.0                        | 40         | 120        | > 99      | 98.8       | 30            | 3         |
| Pt/Fe <sub>3</sub> O <sub>4</sub> | 1.0                        | 30         | 120        | 98.4      | 95.1       | 10            | 4         |
| PtZn/SiO <sub>2</sub>             | 0.1                        | 40         | 72         | > 99      | > 99       | -             | 5         |
| Pt/H-NCNTs                        | 0.5                        | 40         | 20         | > 99      | > 99       | 1.3           | 6         |

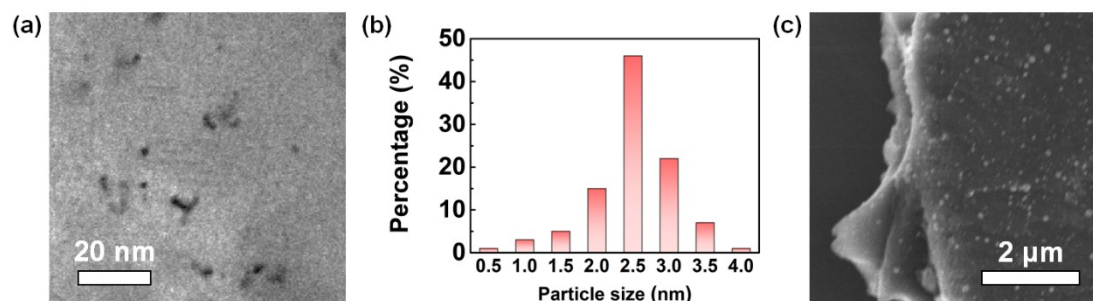

Figure S1. (a) HRTEM image of Pt@KIT-6 nanocomposite; (b) Particle size distribution of Pt nanoparticles in Pt@KIT-6 nanocomposite; (c) SEM image of commercial bulk Pt/C.

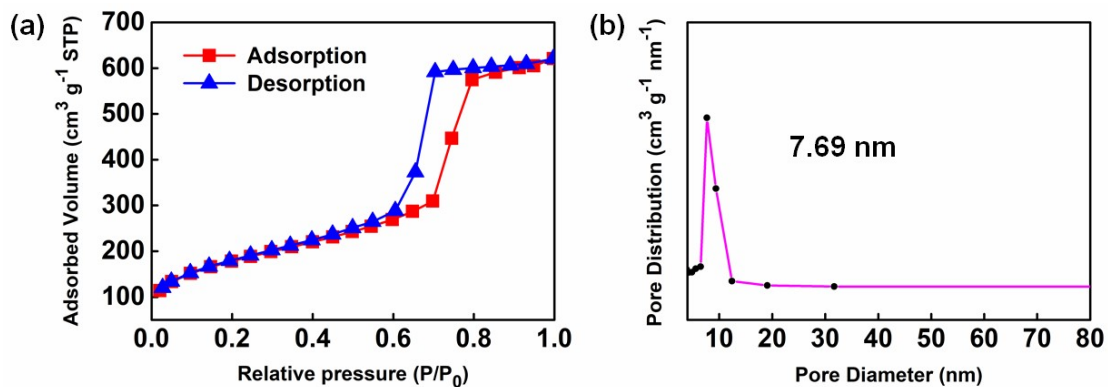

Figure S2. (a)  $N_2$  adsorption-desorption isotherms and (b) pore size distribution of the KIT-6 treated similarly to the entire Pt@KIT-6 nanocomposite synthesis process without the addition of  $PtCl_4$ .

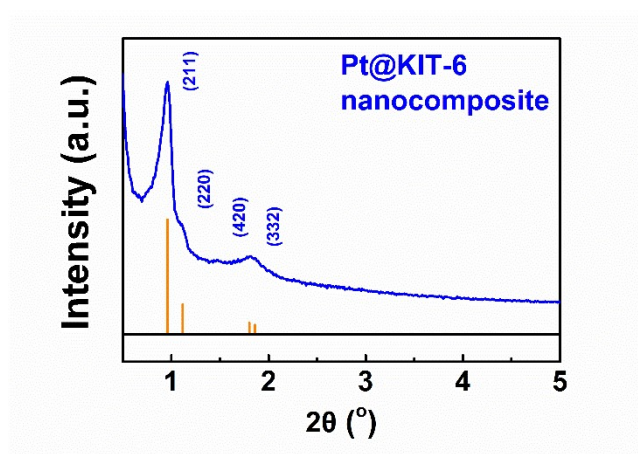

Figure S3. Small-angle XRD pattern of Pt@KIT-6 nanocomposite after 24 h of reaction.

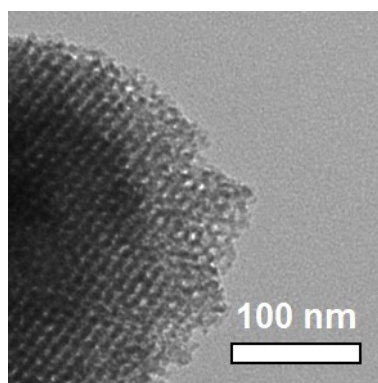

Figure S4. TEM image of Pt@KIT-6 nanocomposite after 24 h of reaction.

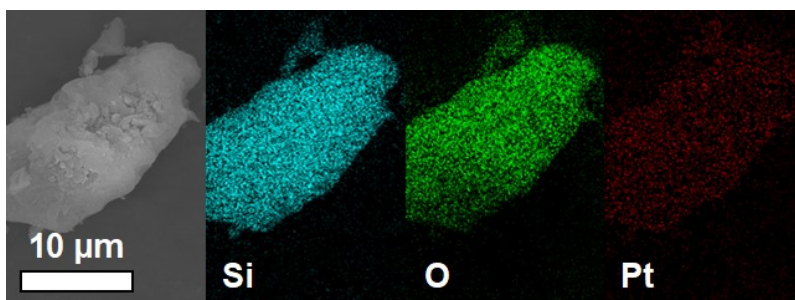

Figure S5. EDS elemental mappings of Pt@KIT-6 nanocomposite after 24 h of reaction.

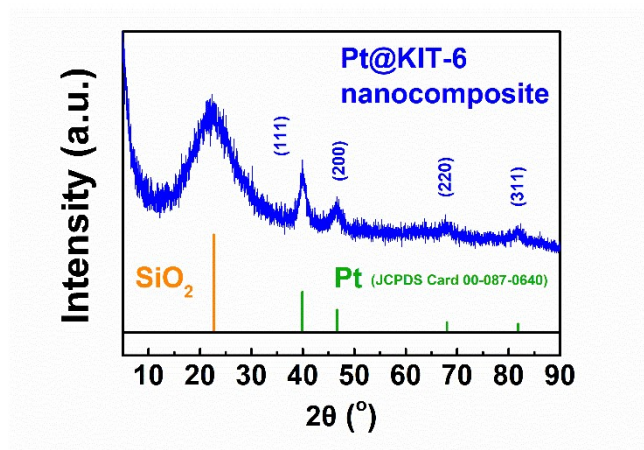

Figure S6. Wide-angle XRD pattern of Pt@KIT-6 nanocomposite after 24 h of reaction.

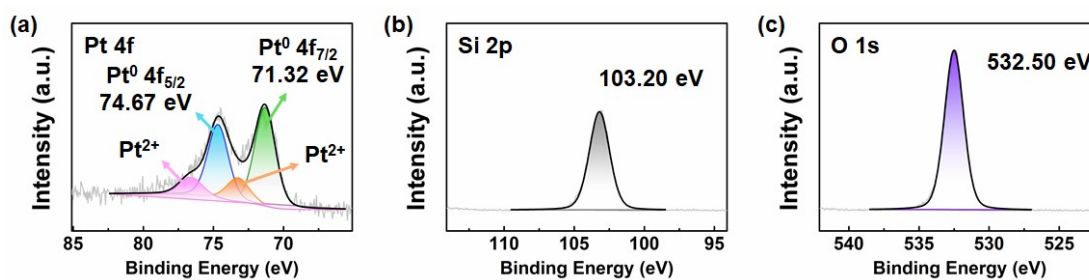

Figure S7. XPS spectra of Pt@KIT-6 nanocomposite after 24 h of reaction: (a) Pt 4f, (b) Si 2p, (c) O 1s.

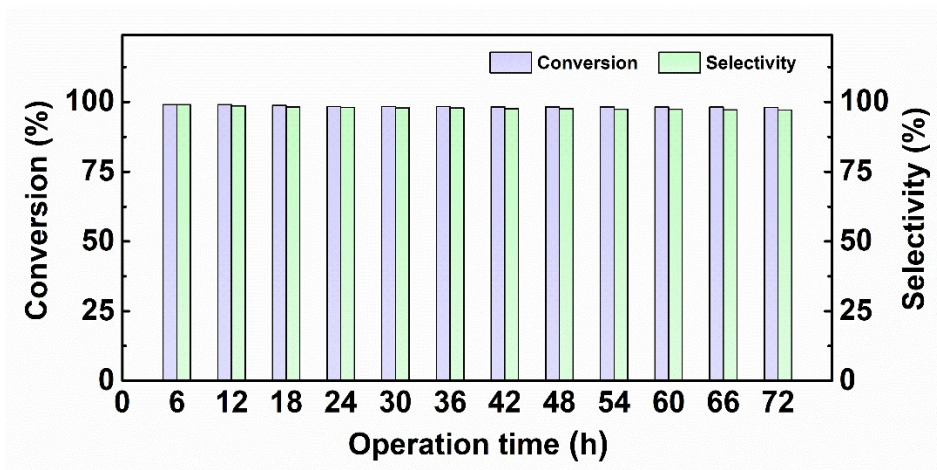

Figure S8. Catalytic stability test of Pt@KIT-6 nanocomposite. Reaction conditions: 4-chloronitrobenzene (0.1 mol/L, methanol as solvent), catalyst (Pt@KIT-6 nanocomposite, 50 mg), flow rate (0.10 mL/min), H<sub>2</sub> (1.0 MPa), back-pressure (0.9 MPa), 20 °C, 5.0 min.

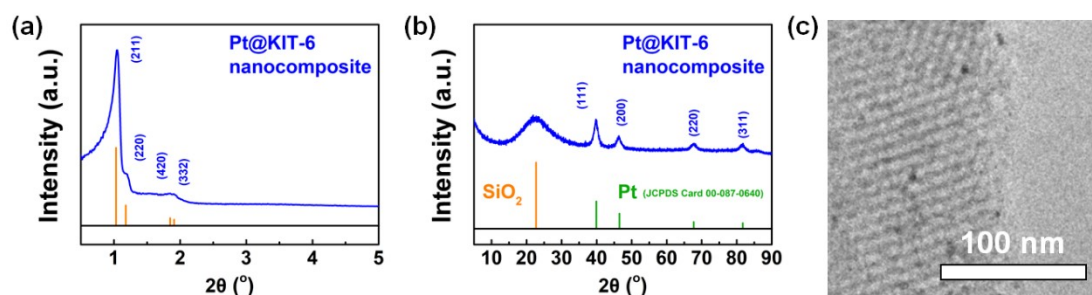

Figure S9. (a) Small-angle XRD pattern, (b) Wide-angle XRD pattern, (c) TEM image of Pt@KIT-6 nanocomposite after 72 h of reaction.

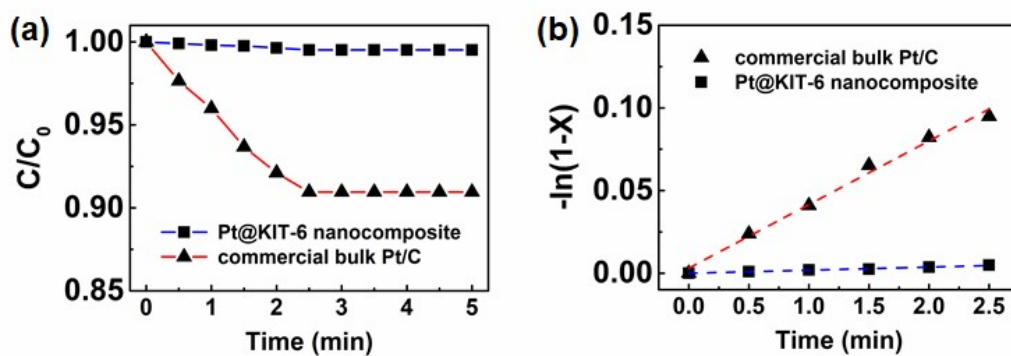

Figure S10. (a) 4-Bromoaniline adsorption test of Pt@KIT-6 nanocomposite and commercial bulk Pt/C; (b) Determination of the adsorption rate constant  $k$ .

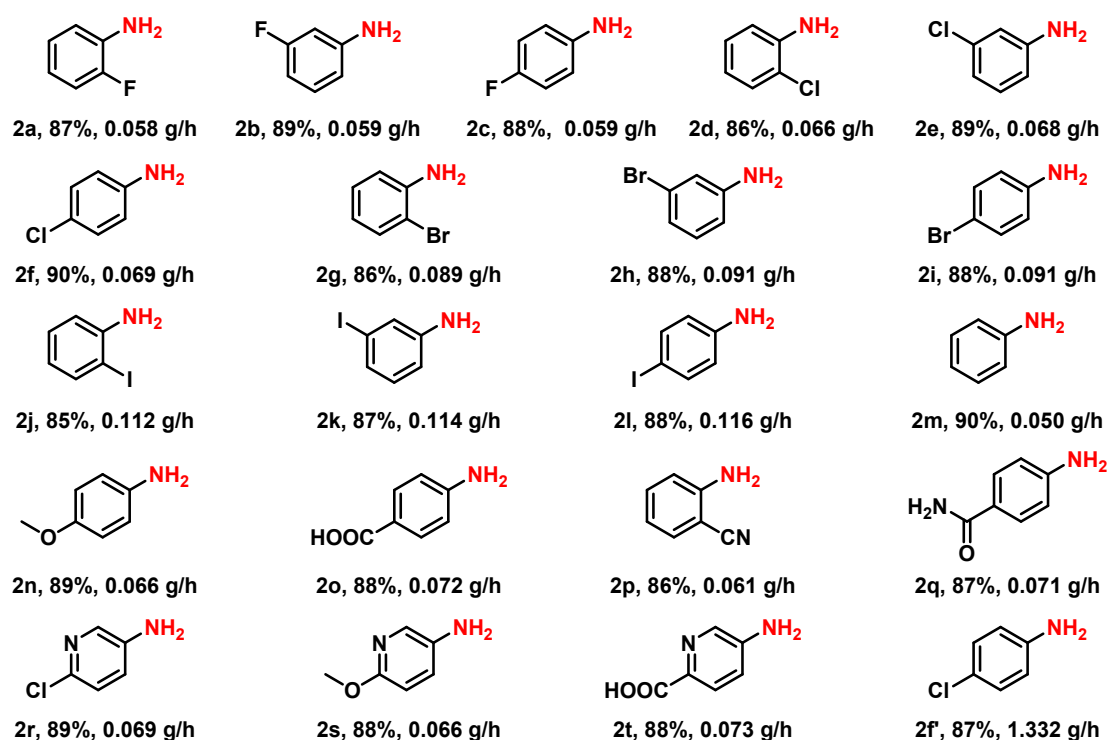

Scheme S1. Isolated yields and production rates of the isolated arylamines.

### Synthesis of KIT-6.

Mesoporous silica template KIT-6 was synthesized following the conventional method reported in the literature.<sup>7</sup> 18 g of Pluronic®P-123 and 30 mL of HCl (12 M) was added into 651 mL of water and the mixture was stirred at 35 °C to dissolve completely. Then, 18 g of *n*-butanol was added and stirred for 1 h at 35 °C. Next, 38.7 g of TEOS was added to the above solution and stirred for 24 h at 35 °C, the solution was then heated under closed conditions for 24 h at 100 °C. After cooling the mixture to room temperature, it was filtered and washed thoroughly using ethanol. The Pluronic®P-123 was then removed by calcination in a muffle furnace at 550 °C in the air for 5 h (heating rate = 1.5 °C min<sup>-1</sup>).

### Hydrogenation residence time in the MFBR.

When the catalyst loading and reactor geometry (diameter and length) are set, the residence time is controlled according to the solution flow rate. We compared the actual volume of liquid collected and the volume of solution consumed in the continuous flow system with steady state operation and found them to be consistent. The overall hydrogenation residence time is therefore the residence time of the solution in the MFBR. Add sufficient water to the MFBR and obtain a weight difference. The void volume of the MFBR is the volume of water corresponding to the weight difference, which is 0.5 mL. If we want to change the residence time in this continuous flow system, we only need to change the flow rate of the solution. The optimization experiments of the flow rate are also carried out to obtain the optimum residence time. Thus, when the optimum flow rate was 0.10 mL/min, the corresponding optimum residence time was 5.0 min.

### Adsorption test

To test the adsorption behaviors of different catalysts, 8.6 mg 4-bromoaniline was added to 100 mL methanol and completely dissolved at 20 °C, followed by adding 100 mg catalyst. The solution was sampled at given time intervals and the concentration of the left 4-bromoaniline in solution was determined by HPLC (Agilent 1100 Series). According to the change of 4-bromoaniline concentration ( $C$ ) with the time ( $t$ ), the adsorption kinetic was studied based on the adsorption equation,

$$\frac{dC}{dt} = kC^n$$

where  $k$  and  $n$  referred to the adsorption rate constant and adsorption order, respectively.

### Characterization of the products

#### 2-Fluoroaniline (2a) <sup>8</sup>

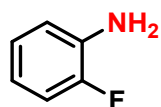



$^1\text{H}$  NMR (600 MHz, DMSO)  $\delta$  6.96 (ddd,  $J$  = 11.9, 8.1, 1.2 Hz, 1H), 6.89 – 6.84 (m, 1H), 6.81 – 6.76 (m, 1H), 6.56 – 6.46 (m, 1H), 5.07 (s, 2H).

$^{13}\text{C}$  NMR (151 MHz, DMSO)  $\delta$  151.16 (d,  $J$  = 235.6 Hz), 136.82 (d,  $J$  = 12.1 Hz), 124.91 (d,  $J$  = 3.0 Hz), 116.75 (d,  $J$  = 4.5 Hz), 116.40 (d,  $J$  = 6.0 Hz), 115.23 (d,  $J$  = 18.1 Hz).

### 3-Fluoroaniline (2b) <sup>8</sup>

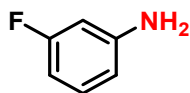

$^1\text{H}$  NMR (600 MHz, DMSO)  $\delta$  7.00 (dd,  $J$  = 15.2, 8.1 Hz, 1H), 6.39 (ddd,  $J$  = 8.1, 2.0, 0.7 Hz, 1H), 6.34 (dt,  $J$  = 12.0, 2.3 Hz, 1H), 6.24 (tdd,  $J$  = 8.9, 2.5, 0.7 Hz, 1H), 5.37 (s, 2H).

$^{13}\text{C}$  NMR (151 MHz, DMSO)  $\delta$  163.83 (d,  $J$  = 240.1 Hz), 151.34 (d,  $J$  = 10.6 Hz), 130.62 (d,  $J$  = 10.6 Hz), 110.38 (d,  $J$  = 3.0 Hz), 102.09 (d,  $J$  = 21.1 Hz), 100.48 (d,  $J$  = 24.2 Hz).

### 4-Fluoroaniline (2c) <sup>8</sup>

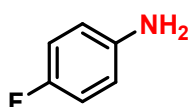

$^1\text{H}$  NMR (600 MHz, DMSO)  $\delta$  6.89 – 6.78 (m, 2H), 6.63 – 6.51 (m, 2H), 4.92 (s, 2H).

$^{13}\text{C}$  NMR (151 MHz, DMSO)  $\delta$  154.73 (d,  $J$  = 231.0 Hz), 145.59 (d,  $J$  = 1.5 Hz), 115.53 (d,  $J$  = 22.7 Hz), 115.12 (d,  $J$  = 7.6 Hz).

### 2-Chloroaniline (2d) <sup>9</sup>

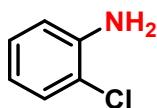

$^1\text{H}$  NMR (600 MHz, DMSO)  $\delta$  7.18 (dd,  $J$  = 7.9, 1.4 Hz, 1H), 7.02 (ddd,  $J$  = 8.1, 7.3, 1.4 Hz, 1H), 6.82 (dd,  $J$  = 8.1, 1.5 Hz, 1H), 6.61 – 6.47 (m, 1H), 5.30 (s, 2H).

$^{13}\text{C}$  NMR (151 MHz, DMSO)  $\delta$  145.10 (s), 129.42 (s), 128.09 (s), 117.59 (s), 117.30 (s), 115.94 (s).

### 3-Chloroaniline (2e) <sup>9</sup>

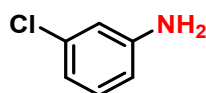

$^1\text{H}$  NMR (600 MHz, DMSO)  $\delta$  7.00 (t,  $J$  = 8.0 Hz, 1H), 6.62 (t,  $J$  = 2.1 Hz, 1H), 6.52 (ddd,  $J$  = 8.1, 2.1, 0.8 Hz, 1H), 6.49 (ddd,  $J$  = 7.8, 2.0, 0.8 Hz, 1H), 5.38 (s, 2H).

$^{13}\text{C}$  NMR (151 MHz, DMSO)  $\delta$  150.82 (s), 133.88 (s), 130.77 (s), 115.47 (s), 113.53 (s), 112.87 (s).

### 4-Chloroaniline (2f) <sup>9</sup>

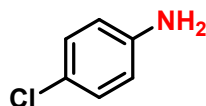

$^1\text{H}$  NMR (600 MHz, DMSO)  $\delta$  7.60 – 6.76 (m, 2H), 6.73 – 6.33 (m, 2H), 5.22 (s, 2H).

$^{13}\text{C}$  NMR (151 MHz, DMSO)  $\delta$  148.15 (s), 128.95 (s), 119.22 (s), 115.68 (s).

### 2-Bromoaniline (2g) <sup>10</sup>

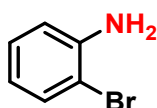



$^1\text{H}$  NMR (600 MHz, DMSO)  $\delta$  7.33 (dd,  $J = 7.9, 1.1$  Hz, 1H), 7.12 – 7.01 (m, 1H), 6.82 (dd,  $J = 8.0, 1.3$  Hz, 1H), 6.55 – 6.38 (m, 1H), 5.27 (s, 2H).

$^{13}\text{C}$  NMR (151 MHz, DMSO)  $\delta$  146.21 (s), 132.57 (s), 128.74 (s), 117.84 (s), 115.92 (s), 107.97 (s).

### 3-Bromoaniline (2h) <sup>9</sup>

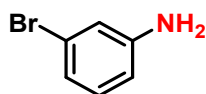

$^1\text{H}$  NMR (600 MHz, DMSO)  $\delta$  6.94 (t,  $J = 8.0$  Hz, 1H), 6.76 (t,  $J = 2.0$  Hz, 1H), 6.65 – 6.59 (m, 1H), 6.55 (dd,  $J = 8.1, 2.0$  Hz, 1H), 5.37 (s, 2H).

$^{13}\text{C}$  NMR (151 MHz, DMSO)  $\delta$  151.05 (s), 131.12 (s), 122.57 (s), 118.30 (s), 116.40 (s), 113.20 (s).

### 4-Bromoaniline (2i) <sup>11</sup>

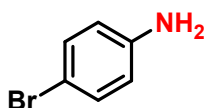

$^1\text{H}$  NMR (600 MHz, DMSO)  $\delta$  7.37 – 6.87 (m, 2H), 6.79 – 6.18 (m, 2H), 5.24 (s, 2H).

$^{13}\text{C}$  NMR (151 MHz, DMSO)  $\delta$  148.50 (s), 131.79 (s), 116.30 (s), 106.61 (s).

### 2-Iodoaniline (2j) <sup>8</sup>

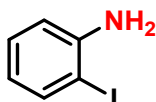

$^1\text{H}$  NMR (600 MHz, DMSO)  $\delta$  7.54 (dd,  $J = 7.8, 1.3$  Hz, 1H), 7.17 – 6.99 (m, 1H), 6.78 (dd,  $J = 8.0, 1.3$  Hz, 1H), 6.33 (td,  $J = 7.8, 1.4$  Hz, 1H), 5.19 (s, 2H).

$^{13}\text{C}$  NMR (151 MHz, DMSO)  $\delta$  148.87 (s), 138.91 (s), 129.53 (s), 118.62 (s), 114.91 (s), 83.69 (s).

### 3-Iodoaniline (2k) <sup>9</sup>

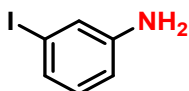

$^1\text{H}$  NMR (600 MHz, DMSO)  $\delta$  6.96 (d,  $J = 1.7$  Hz, 1H), 6.86 – 6.72 (m, 2H), 6.56 (dt,  $J = 7.2, 1.9$  Hz, 1H), 5.28 (s, 2H).

$^{13}\text{C}$  NMR (151 MHz, DMSO)  $\delta$  150.93 (s), 131.30 (s), 124.36 (s), 122.41 (s), 113.68 (s), 95.74 (s).

### 4-Iodoaniline (2l) <sup>8</sup>

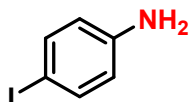

$^1\text{H}$  NMR (600 MHz, DMSO)  $\delta$  7.43 – 7.17 (m, 2H), 6.64 – 6.30 (m, 2H), 5.26 (s, 2H).

$^{13}\text{C}$  NMR (151 MHz, DMSO)  $\delta$  148.96 (s), 137.56 (s), 117.03 (s), 76.24 (s).

### Aniline (2m) <sup>11</sup>

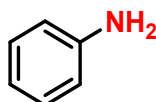

$^1\text{H}$  NMR (600 MHz, DMSO)  $\delta$  7.03 (t,  $J = 7.8$  Hz, 2H), 6.59 (d,  $J = 7.6$  Hz, 2H), 6.51 (t,  $J = 7.3$  Hz, 1H), 4.99 (s, 2H).

$^{13}\text{C}$  NMR (151 MHz, DMSO)  $\delta$  149.05 (s), 129.28 (s), 116.19 (s), 114.41 (s).

### 4-Anisidine (2n) <sup>11</sup>

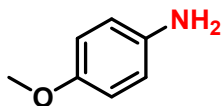

$^1\text{H NMR}$  (600 MHz, DMSO)  $\delta$  6.71 – 6.63 (m, 2H), 6.59 – 6.51 (m, 2H), 4.59 (s, 2H), 3.63 (s, 3H).

$^{13}\text{C NMR}$  (151 MHz, DMSO)  $\delta$  151.20 (s), 142.73 (s), 115.49 (s), 114.97 (s), 55.75 (s).

#### 4-Aminobenzoic Acid (2o) <sup>8</sup>

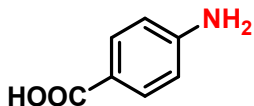

$^1\text{H NMR}$  (600 MHz, DMSO)  $\delta$  11.94 (s, 1H), 7.76 – 7.50 (m, 2H), 6.71 – 6.40 (m, 2H), 5.87 (s, 2H).

$^{13}\text{C NMR}$  (151 MHz, DMSO)  $\delta$  167.98 (s), 153.61 (s), 131.69 (s), 117.37 (s), 113.06 (s).

#### 2-Aminobenzonitrile (2p) <sup>12</sup>

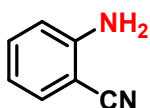

$^1\text{H NMR}$  (600 MHz, DMSO)  $\delta$  7.36 (dd,  $J = 7.8, 1.3$  Hz, 1H), 7.32 – 7.26 (m, 1H), 6.80 (d,  $J = 8.4$  Hz, 1H), 6.58 (t,  $J = 7.5$  Hz, 1H), 6.01 (s, 2H).

$^{13}\text{C NMR}$  (151 MHz, DMSO)  $\delta$  152.06 (s), 134.39 (s), 132.86 (s), 118.59 (s), 116.37 (s), 115.67 (s), 93.91 (s).

#### 4-Aminobenzamide (2q) <sup>13</sup>

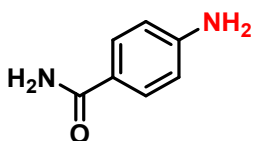

$^1\text{H NMR}$  (600 MHz, DMSO)  $\delta$  7.60 (d,  $J = 8.6$  Hz, 2H), 7.54 (s, 1H), 6.84 (s, 1H), 6.53 (d,  $J = 8.6$  Hz, 2H), 5.60 (s, 2H).

$^{13}\text{C NMR}$  (151 MHz, DMSO)  $\delta$  168.59 (s), 152.15 (s), 129.59 (s), 121.39 (s), 112.95 (s).

#### 5-Amino-2-chloropyridine (2r) <sup>14</sup>

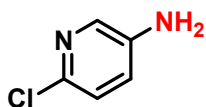

$^1\text{H NMR}$  (600 MHz, DMSO)  $\delta$  7.72 (d,  $J = 2.9$  Hz, 1H), 7.08 (d,  $J = 8.5$  Hz, 1H), 7.00 (dd,  $J = 8.5, 3.0$  Hz, 1H), 5.49 (s, 2H).

$^{13}\text{C NMR}$  (151 MHz, DMSO)  $\delta$  144.99 (s), 136.51 (s), 135.59 (s), 124.26 (s), 124.19 (s).

#### 2-Methoxy-5-amino pyridine (2s) <sup>15</sup>

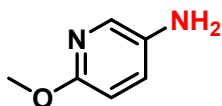

$^1\text{H NMR}$  (600 MHz, DMSO)  $\delta$  7.54 (d,  $J = 2.5$  Hz, 1H), 7.03 (dd,  $J = 8.6, 2.8$  Hz, 1H), 6.55 (dd,  $J = 8.6, 2.2$  Hz, 1H), 4.74 (s, 2H), 3.72 (d,  $J = 2.6$  Hz, 3H).

$^{13}\text{C NMR}$  (151 MHz, DMSO)  $\delta$  156.21 (s), 139.86 (s), 131.58 (s), 126.82 (s), 110.42 (s), 53.10 (s).

#### 5-Amino-2-pyridinecarboxylic acid (2t) <sup>16</sup>

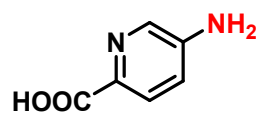

$^1\text{H NMR}$  (600 MHz, DMSO)  $\delta$  7.98 (d,  $J = 2.5$  Hz, 1H), 7.75 (d,  $J = 8.5$  Hz, 1H), 6.95 (dd,  $J = 8.5, 2.6$  Hz, 1H), 6.17 (s, 2H).

$^{13}\text{C NMR}$  (151 MHz, DMSO)  $\delta$  166.61 (s), 148.54 (s), 135.70 (s), 135.06 (s), 126.60 (s), 118.98 (s).

**4-Chloroaniline (2f)** <sup>9</sup>

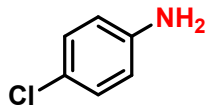

$^1\text{H NMR}$  (600 MHz, DMSO)  $\delta$  7.12 – 6.92 (m, 2H), 6.70 – 6.46 (m, 2H), 5.22 (s, 2H).

$^{13}\text{C NMR}$  (151 MHz, DMSO)  $\delta$  148.12 (s), 128.94 (s), 119.29 (s), 115.70 (s).

## Copies of $^1\text{H}$ and $^{13}\text{C}$ NMR Spectra

### 2a $^1\text{H}$ NMR

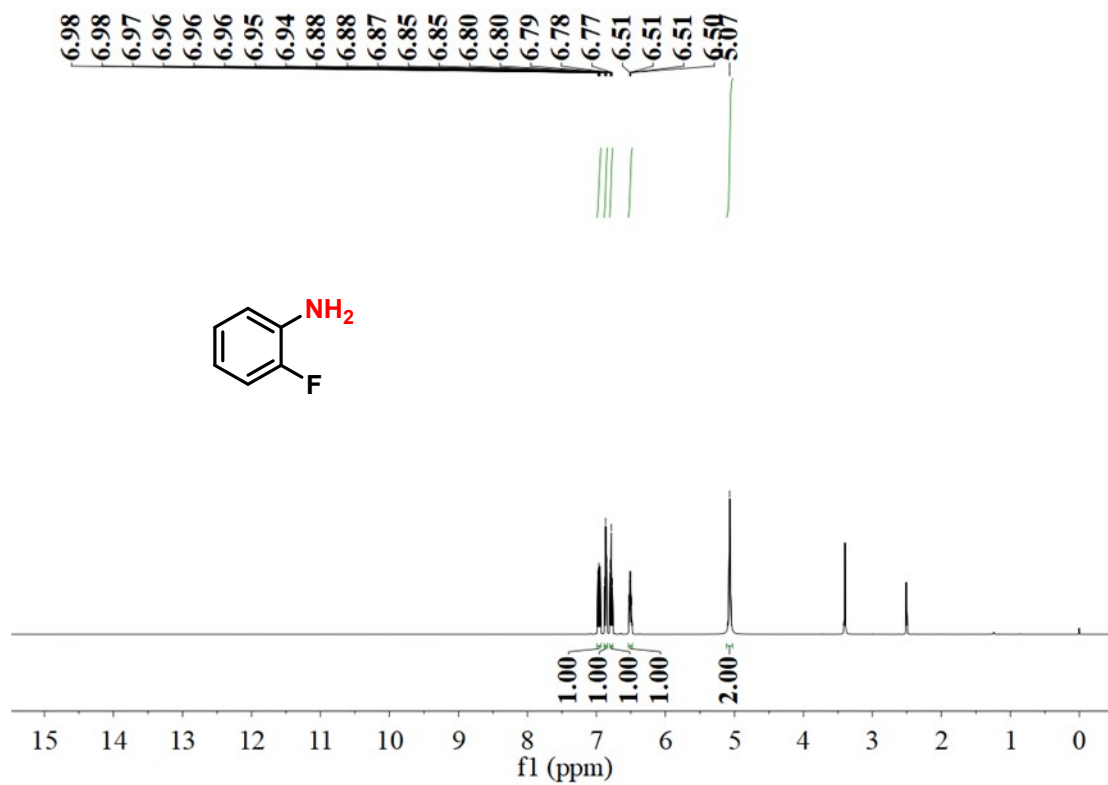

### 2a $^{13}\text{C}$ NMR

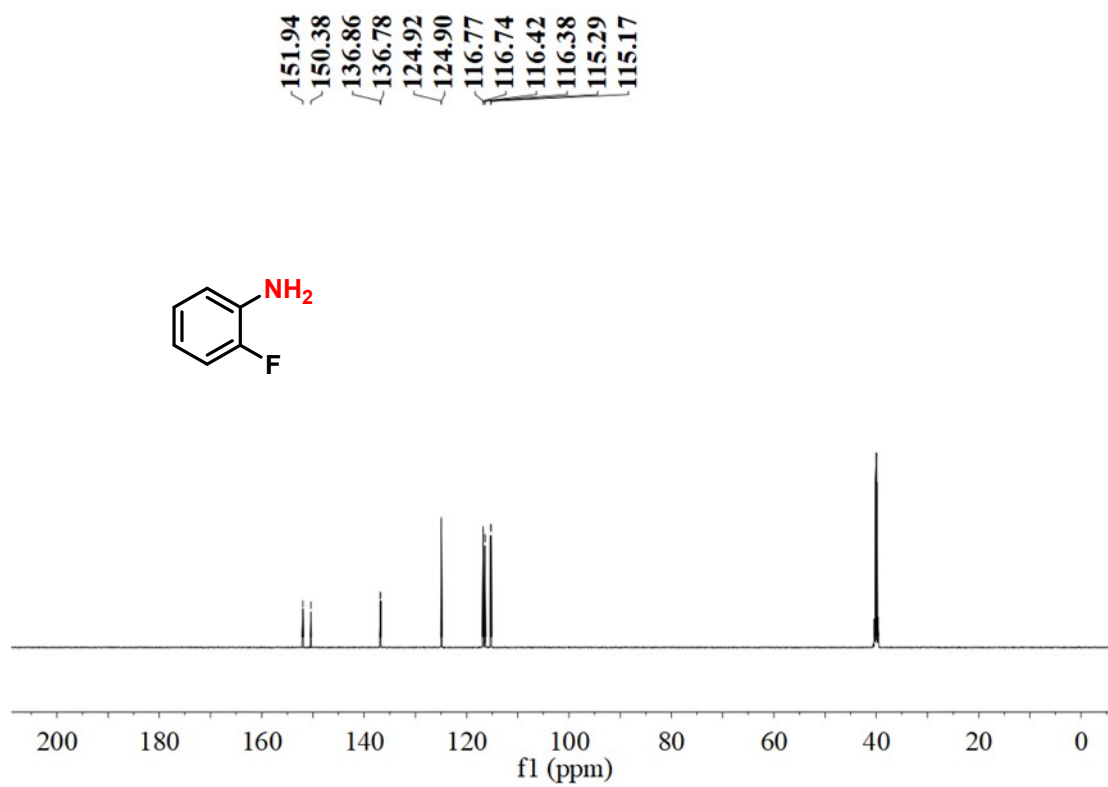

### 2b <sup>1</sup>H NMR

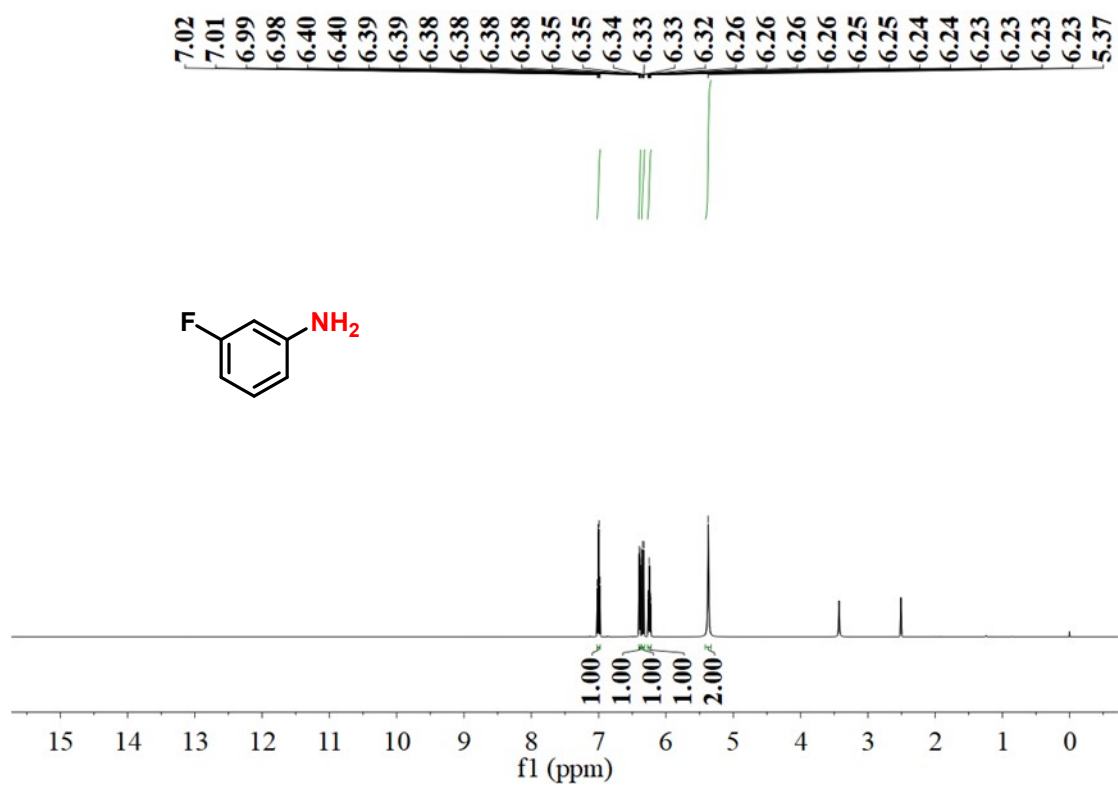

### 2b <sup>13</sup>C NMR

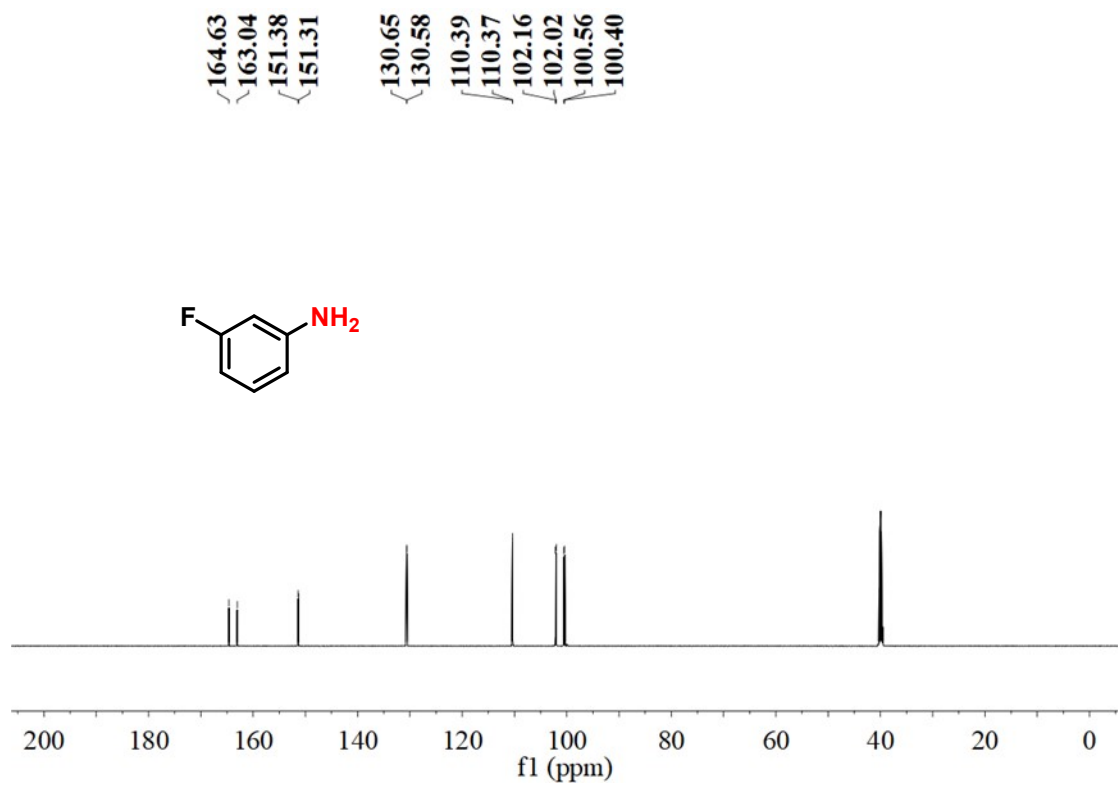

2c <sup>1</sup>H NMR

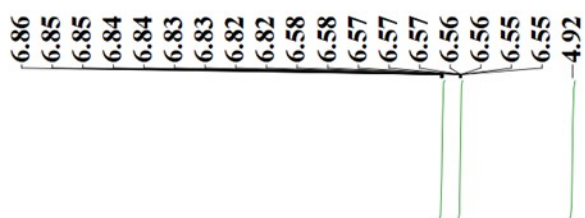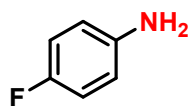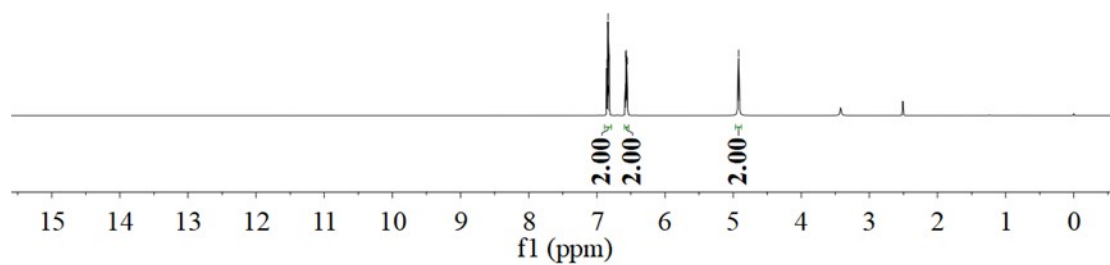

2c <sup>13</sup>C NMR

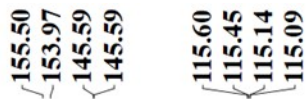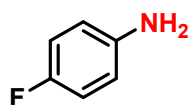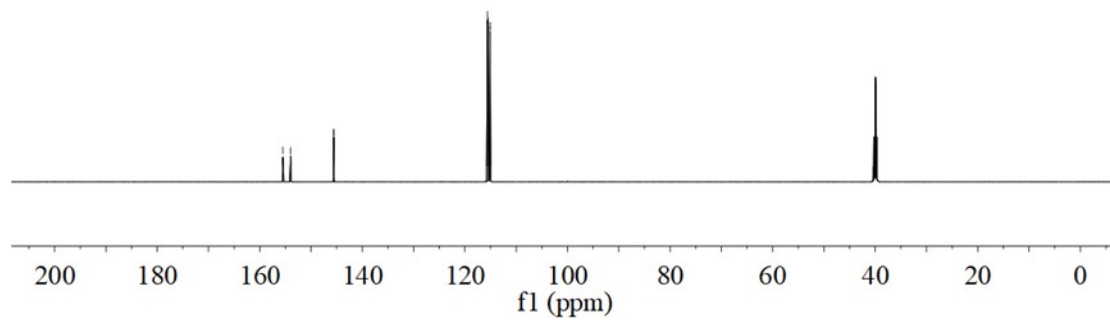

### 2d <sup>1</sup>H NMR

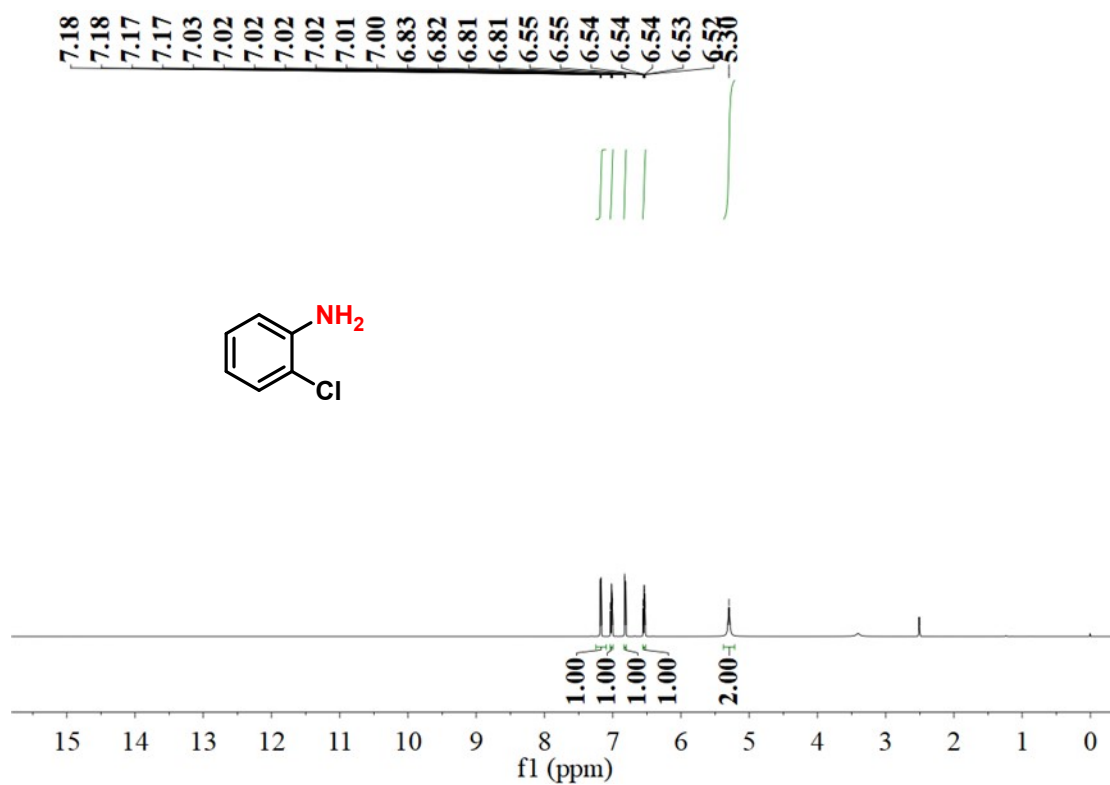

### 2d <sup>13</sup>C NMR

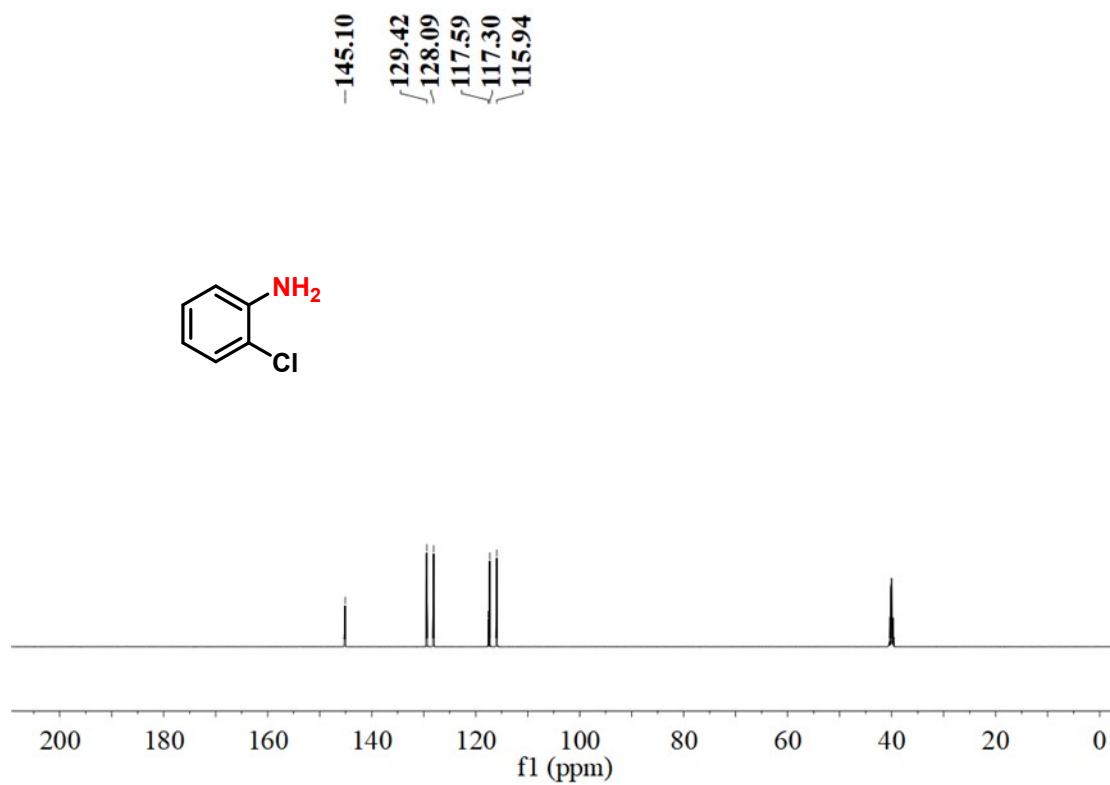



2e <sup>1</sup>H NMR

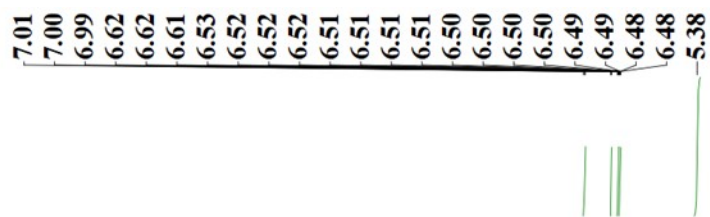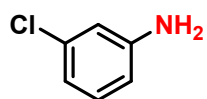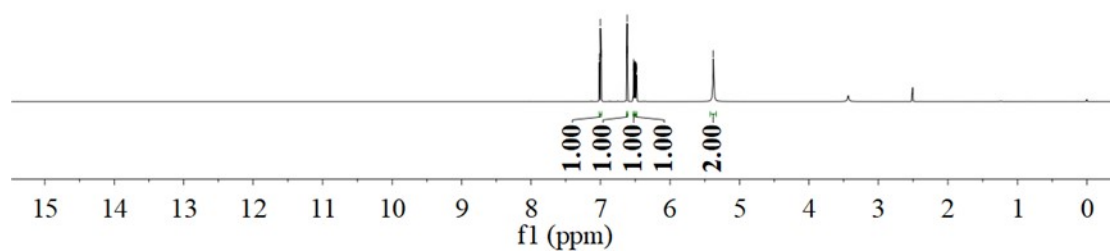

2e <sup>13</sup>C NMR

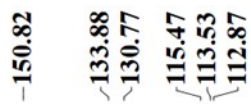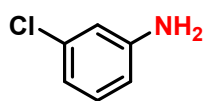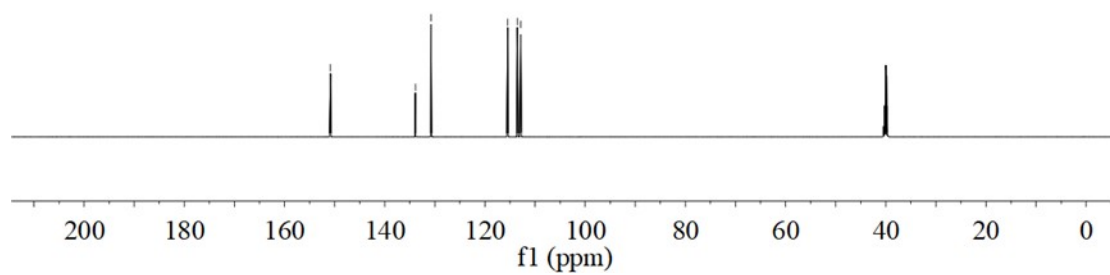

### 2f <sup>1</sup>H NMR

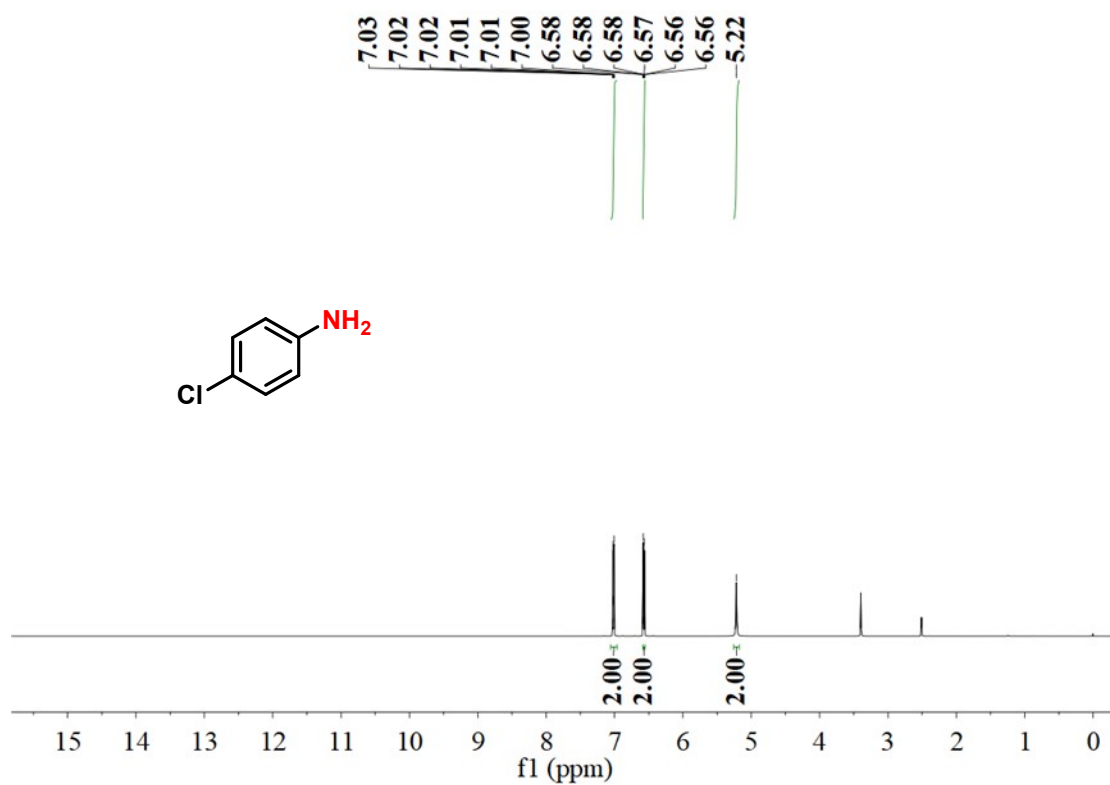

### 2f <sup>13</sup>C NMR

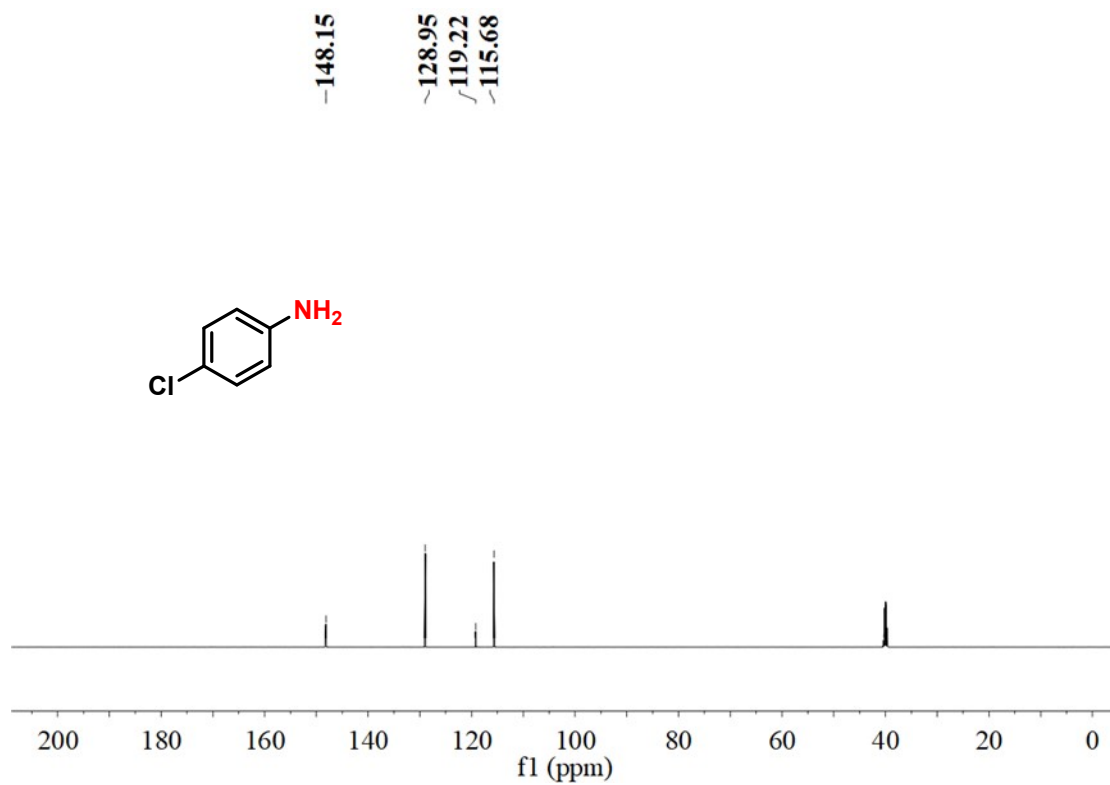

2g <sup>1</sup>H NMR

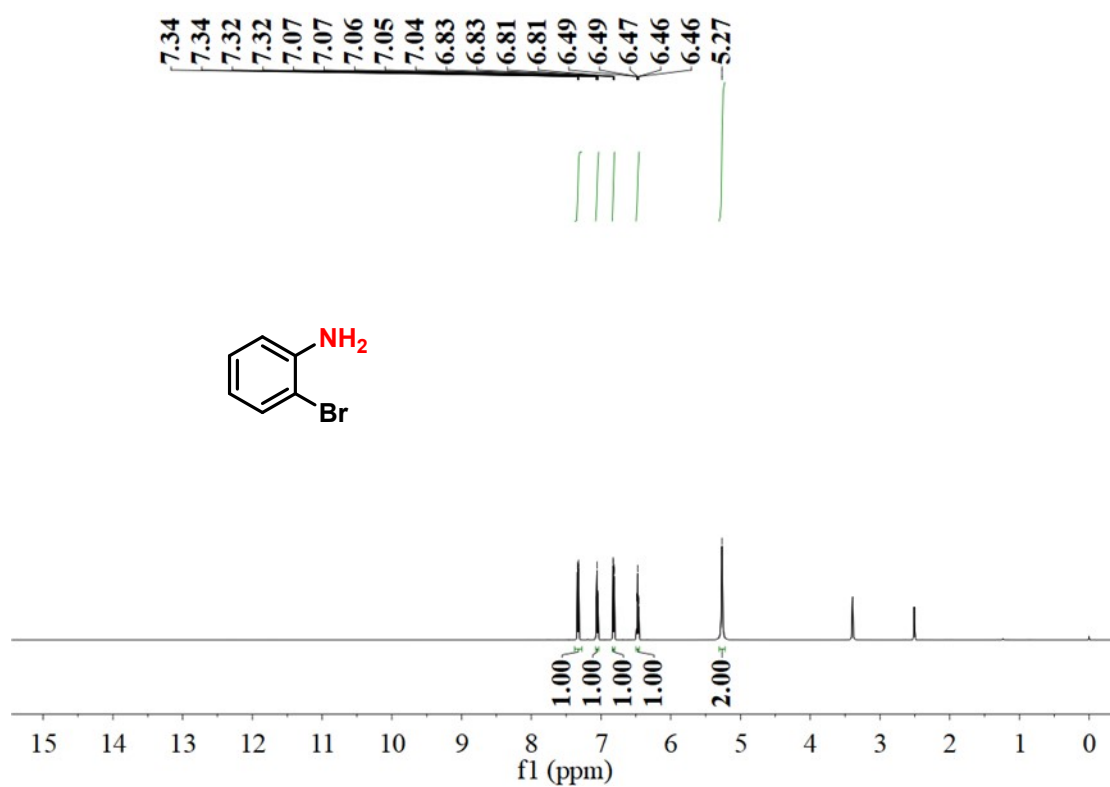

2g <sup>13</sup>C NMR

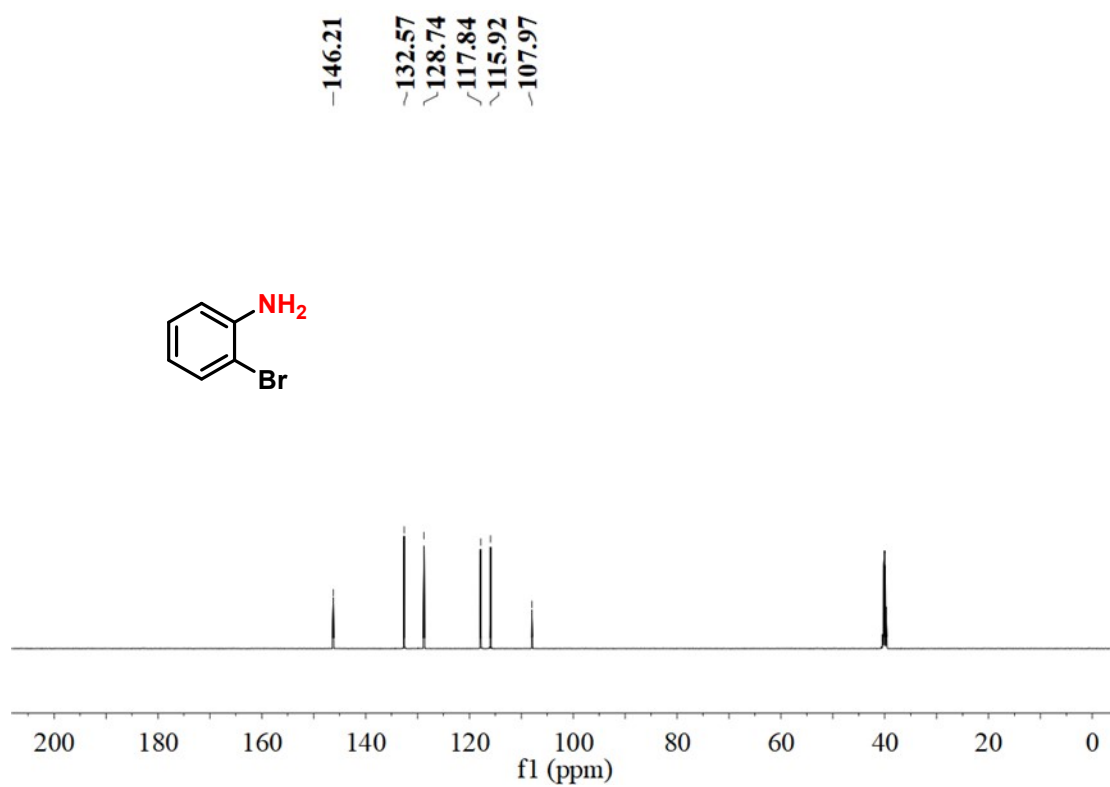

2h <sup>1</sup>H NMR

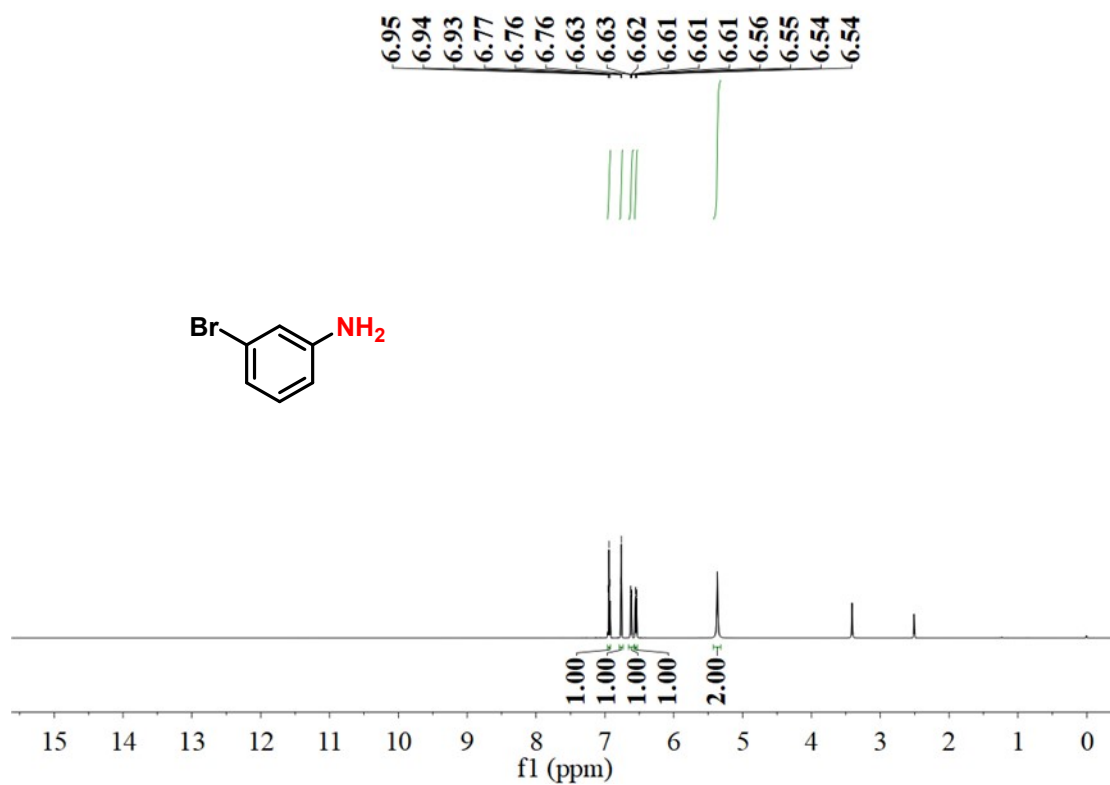

2h <sup>13</sup>C NMR

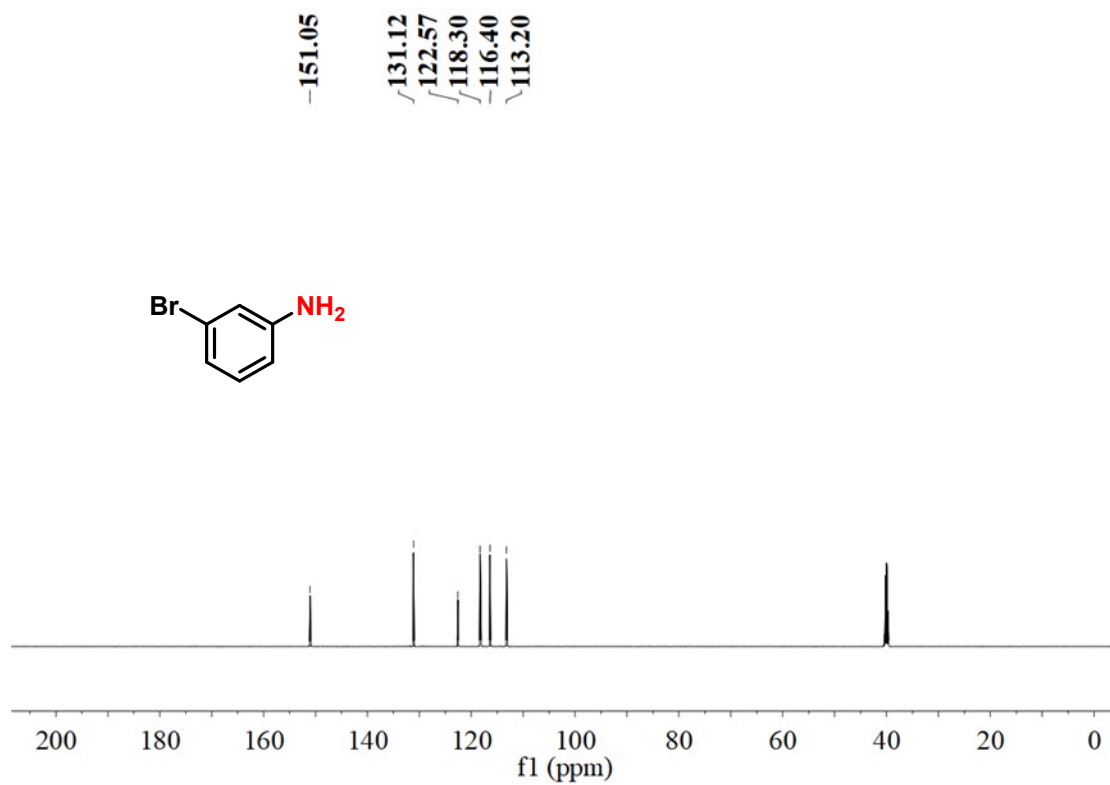

2i <sup>1</sup>H NMR

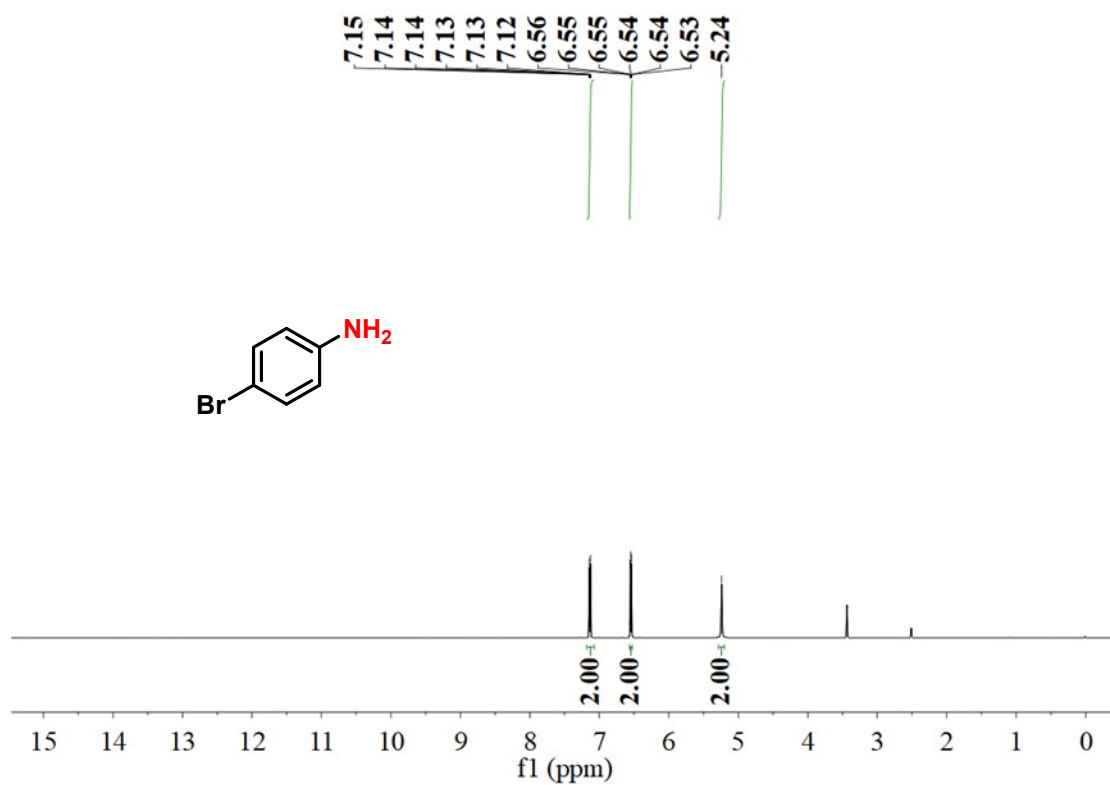

2i <sup>13</sup>C NMR

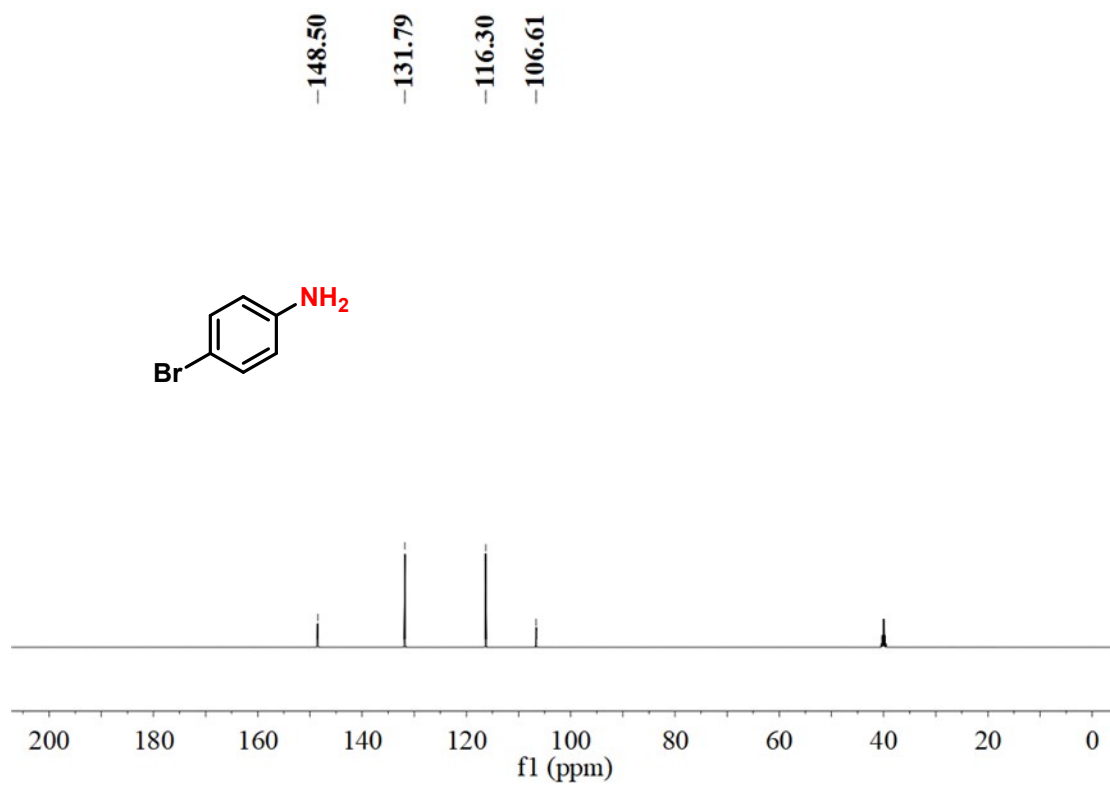

### 2j <sup>1</sup>H NMR

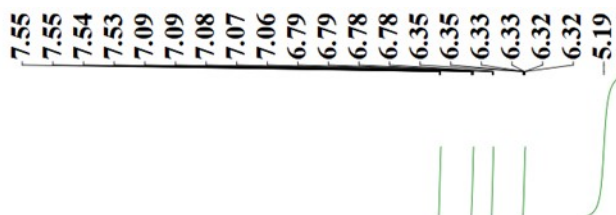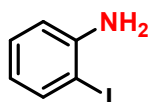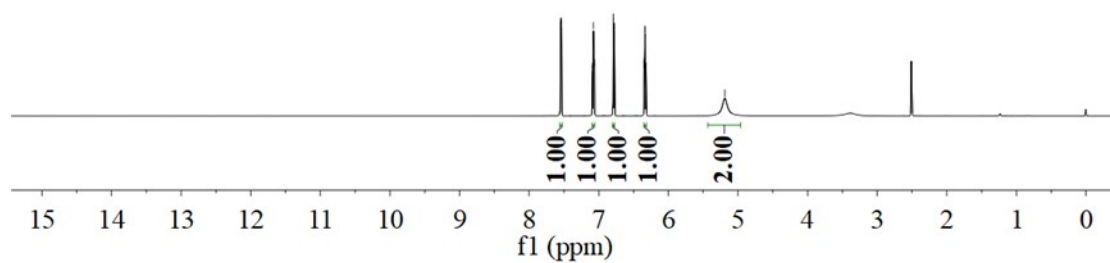

### 2j <sup>13</sup>C NMR

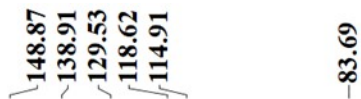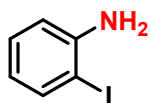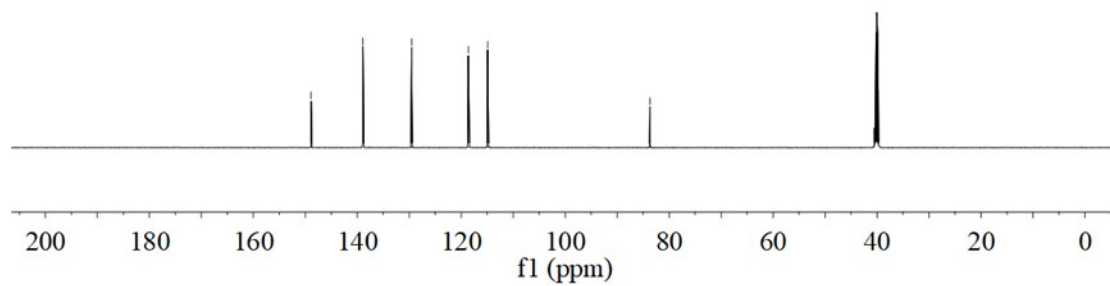

2k <sup>1</sup>H NMR

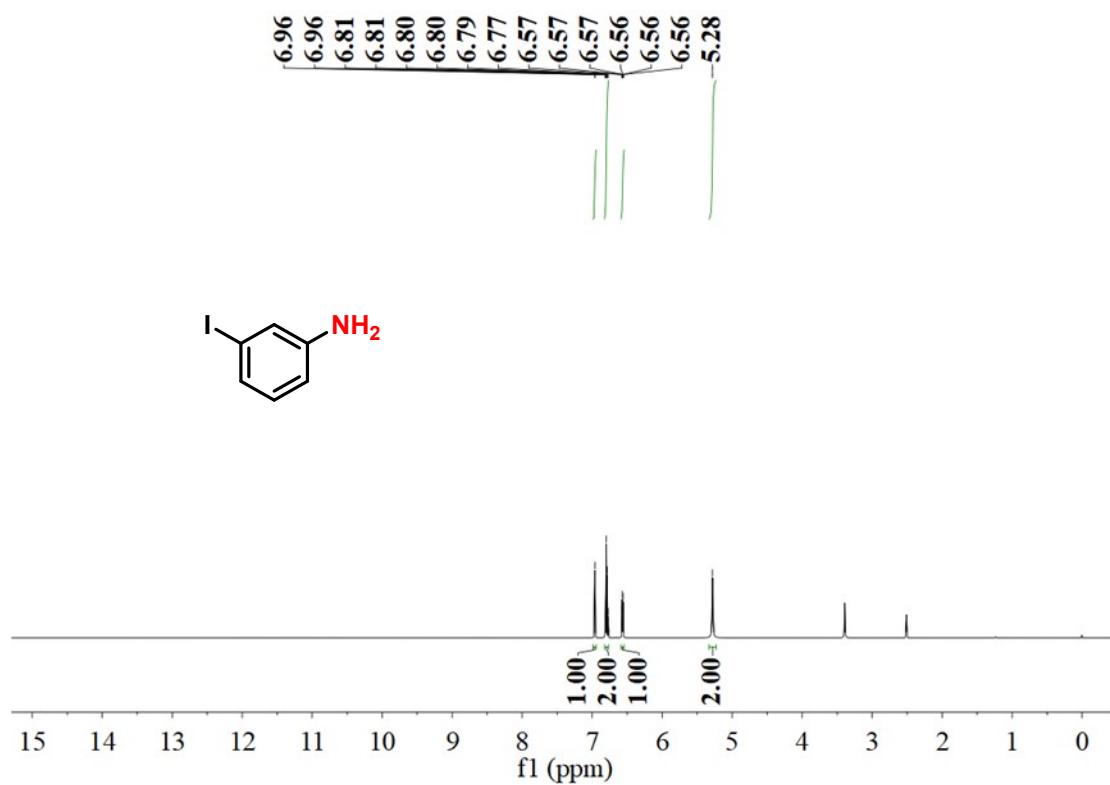

2k <sup>13</sup>C NMR

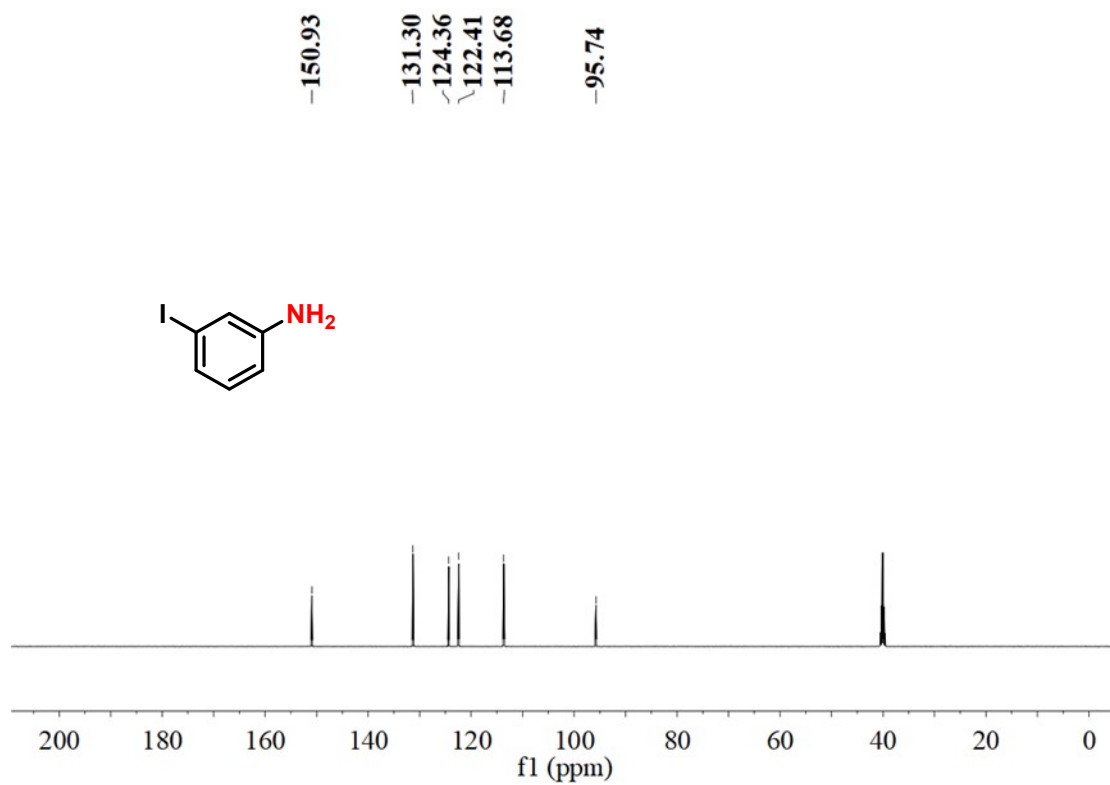



### 21 <sup>1</sup>H NMR

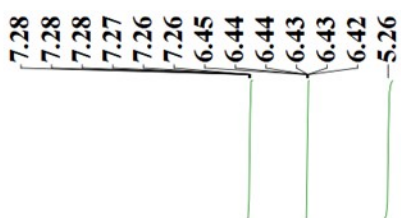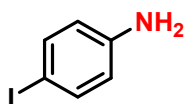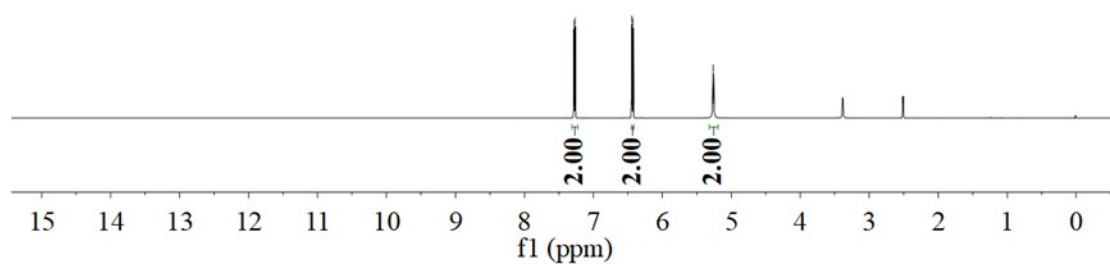

### 21 <sup>13</sup>C NMR

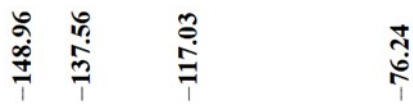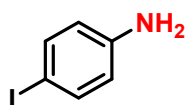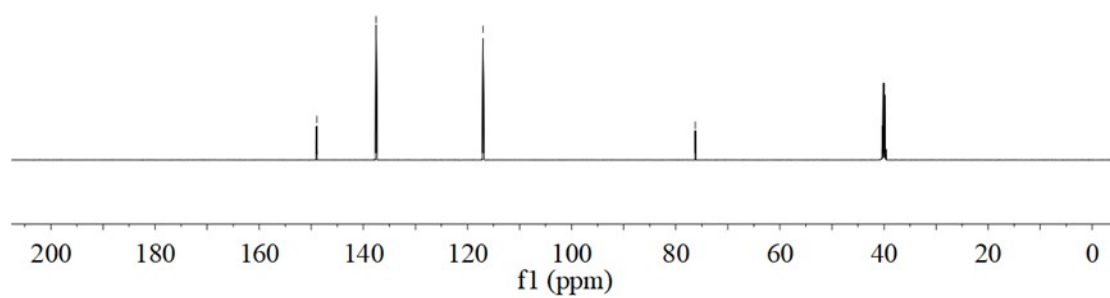

2m <sup>1</sup>H NMR

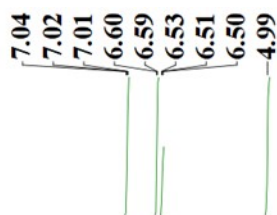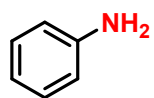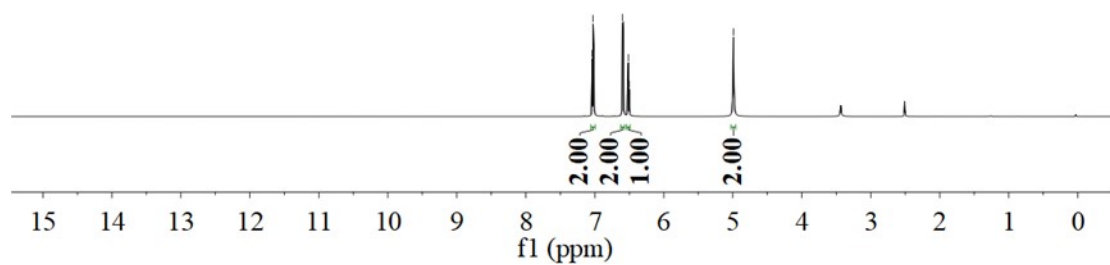

2m <sup>13</sup>C NMR

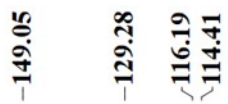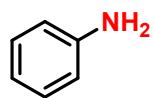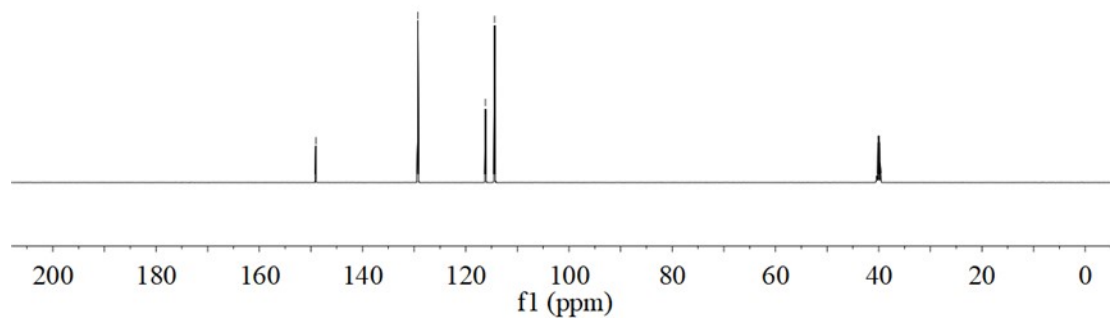

2n <sup>1</sup>H NMR

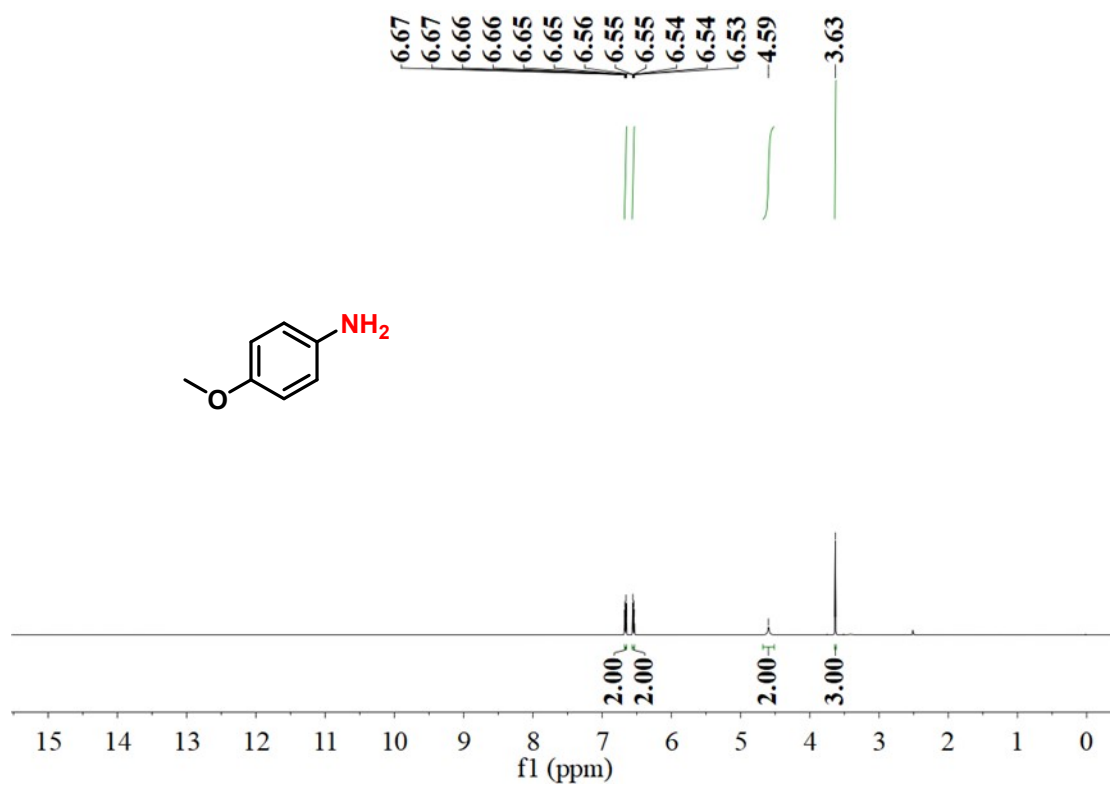

2n <sup>13</sup>C NMR

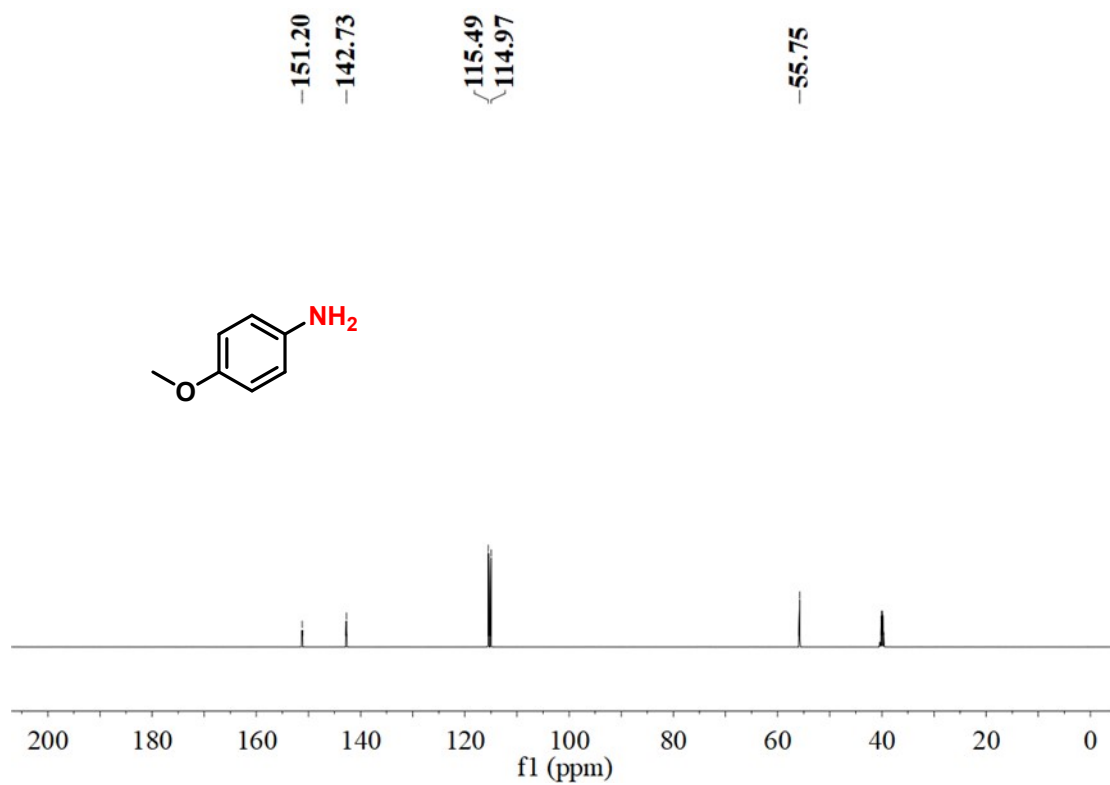

2o <sup>1</sup>H NMR

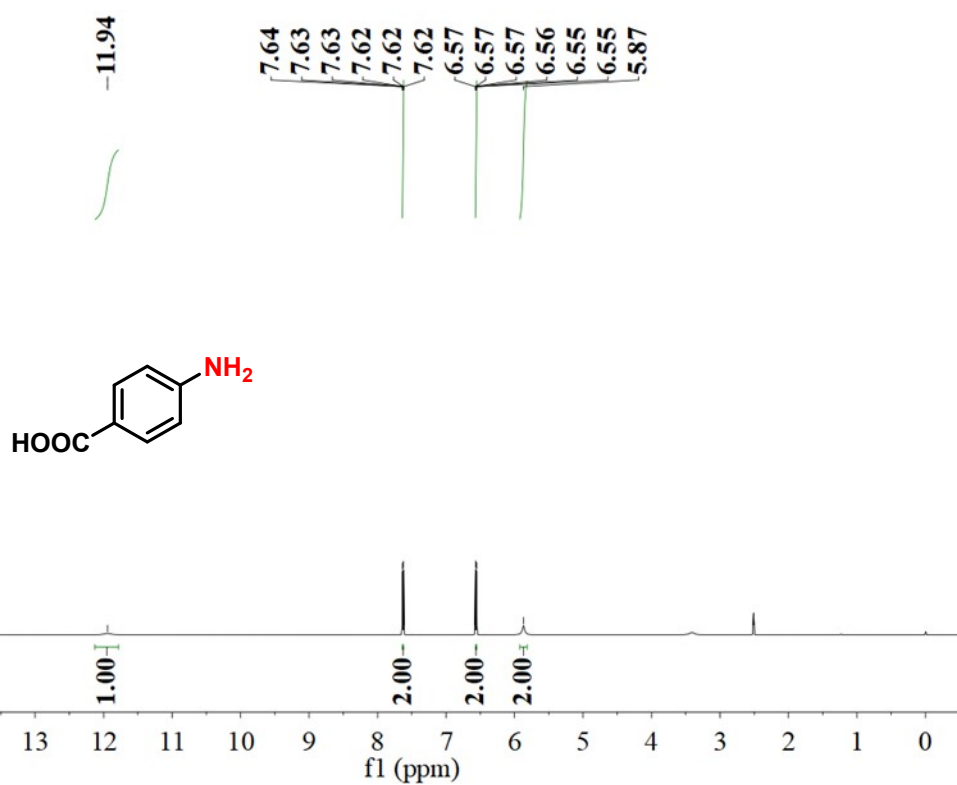

2o <sup>13</sup>C NMR

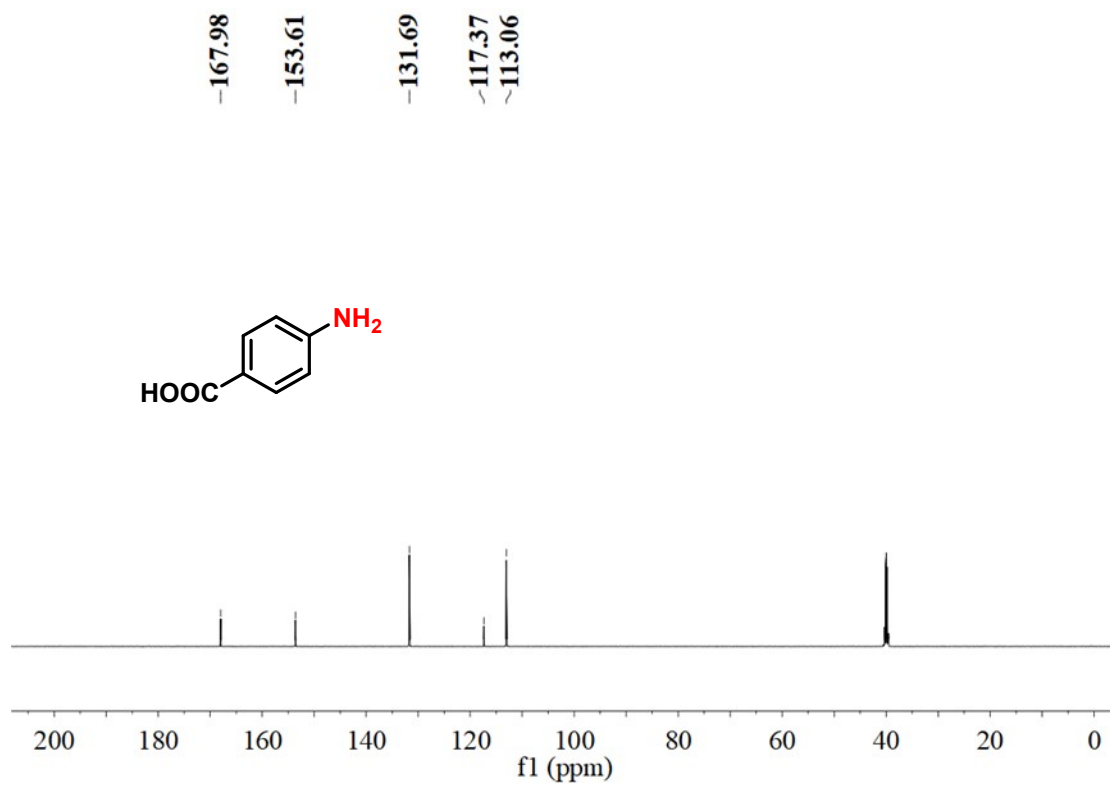

2p <sup>1</sup>H NMR

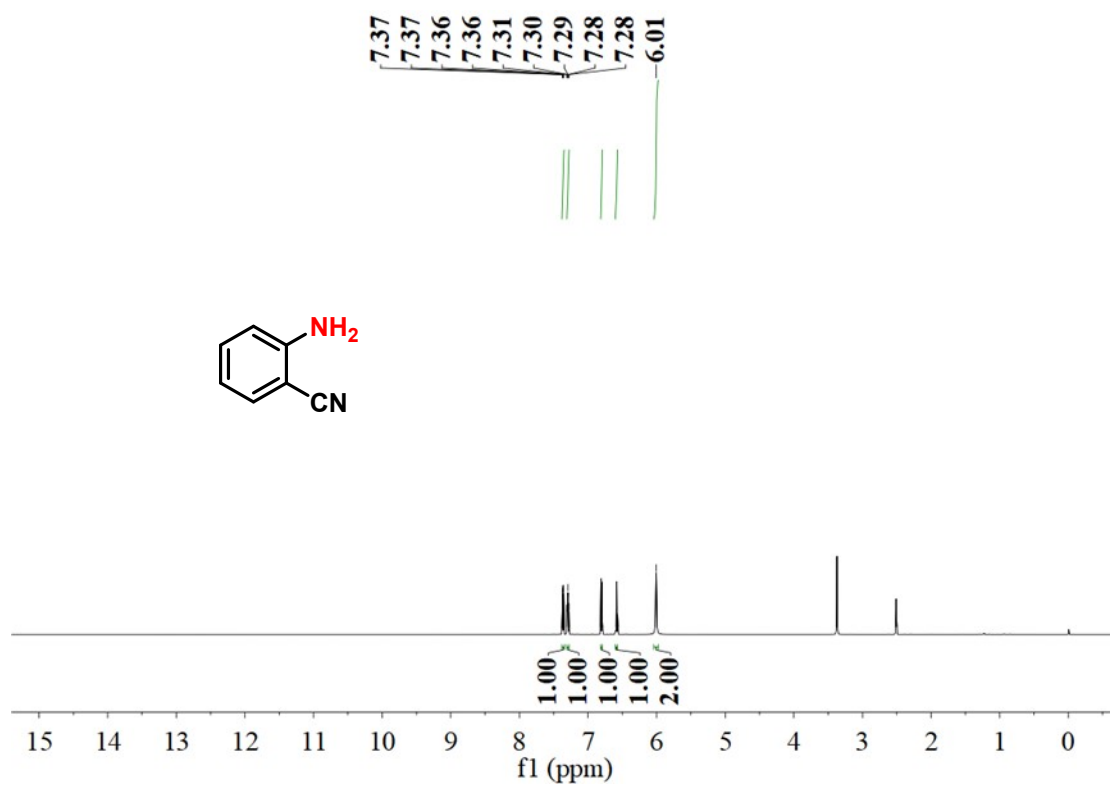

2p <sup>13</sup>C NMR

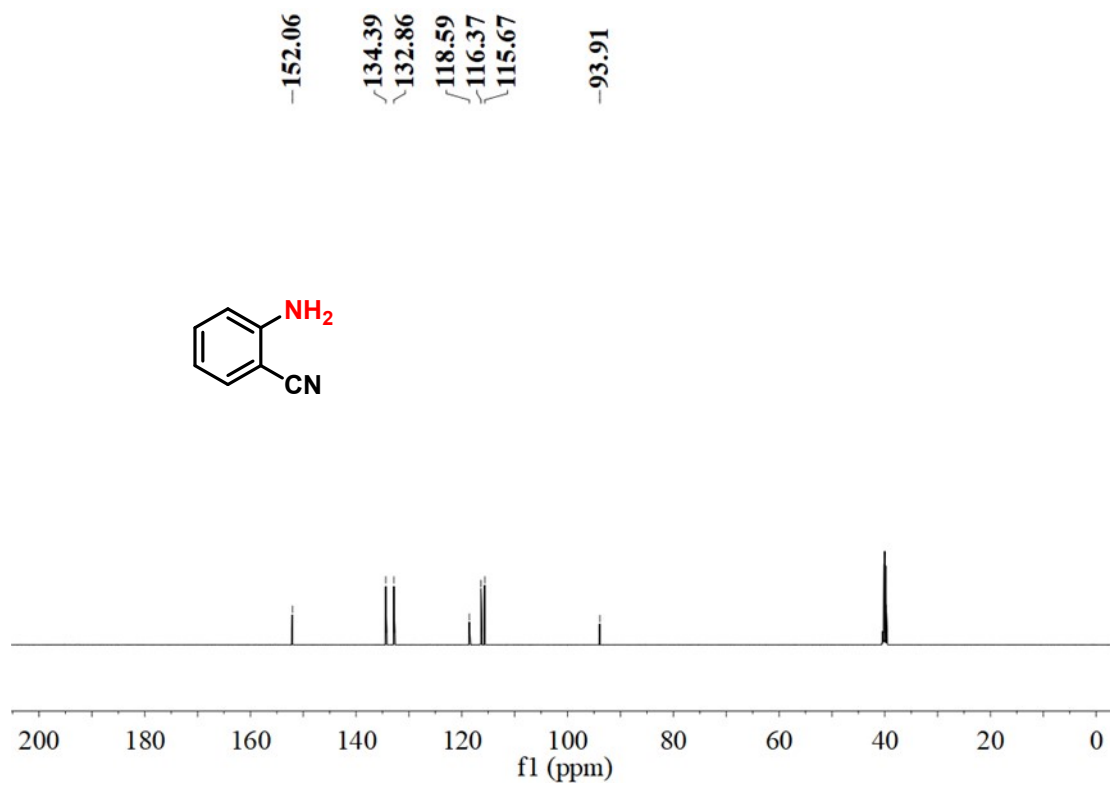

2q <sup>1</sup>H NMR

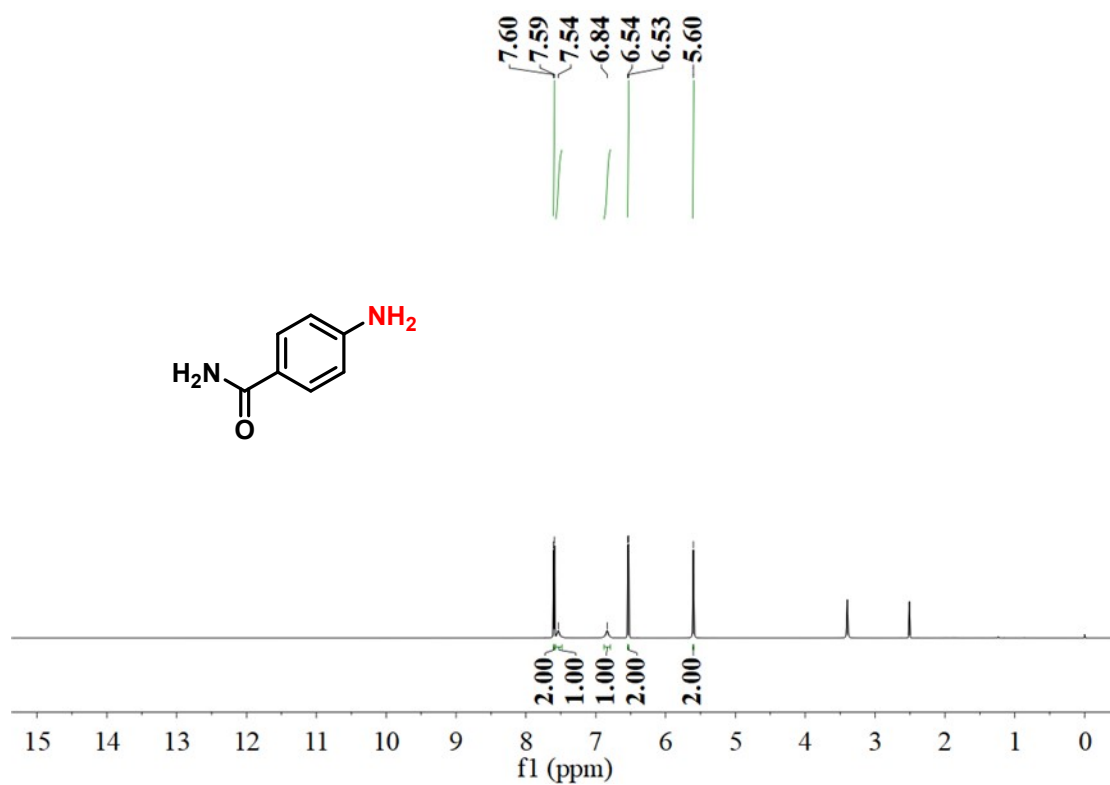

2q <sup>13</sup>C NMR

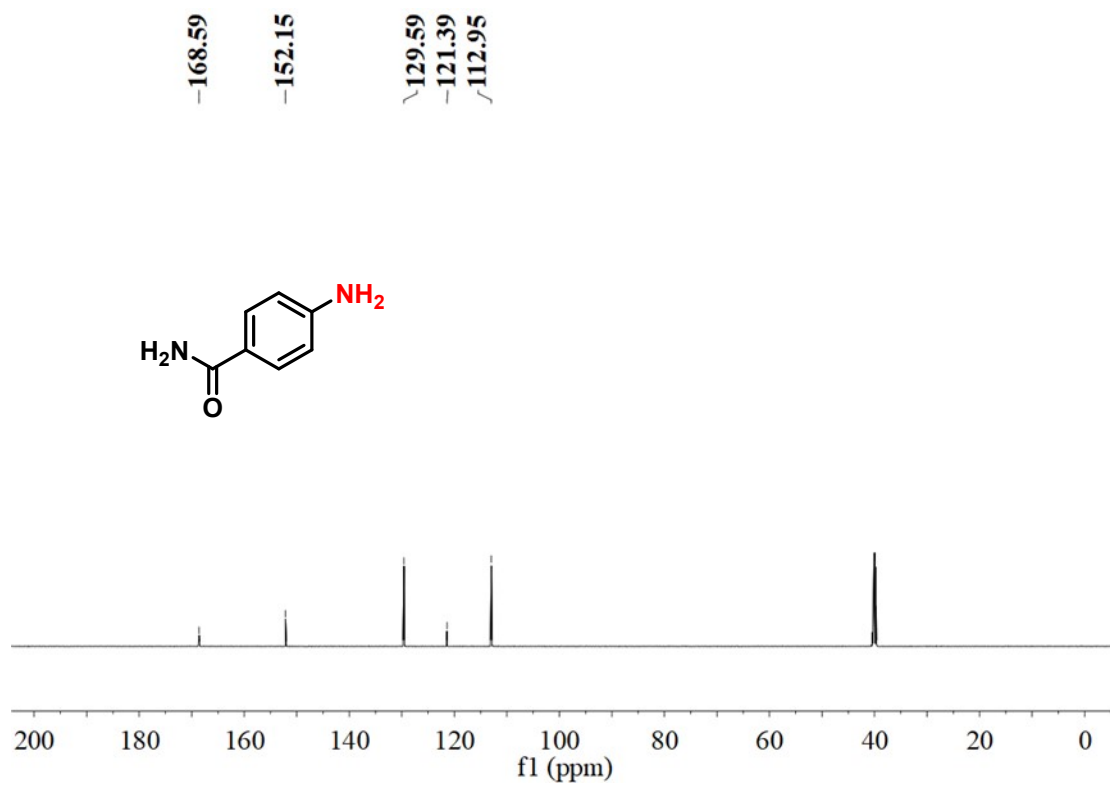

2r <sup>1</sup>H NMR

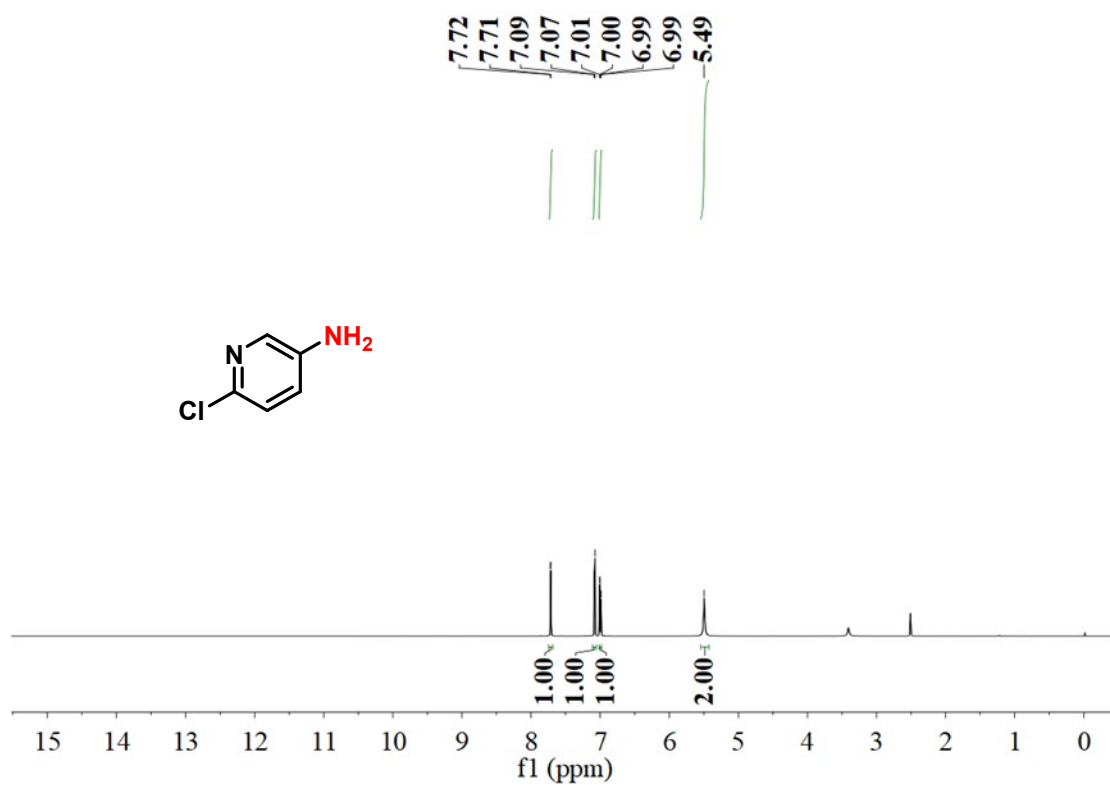

2r <sup>13</sup>C NMR

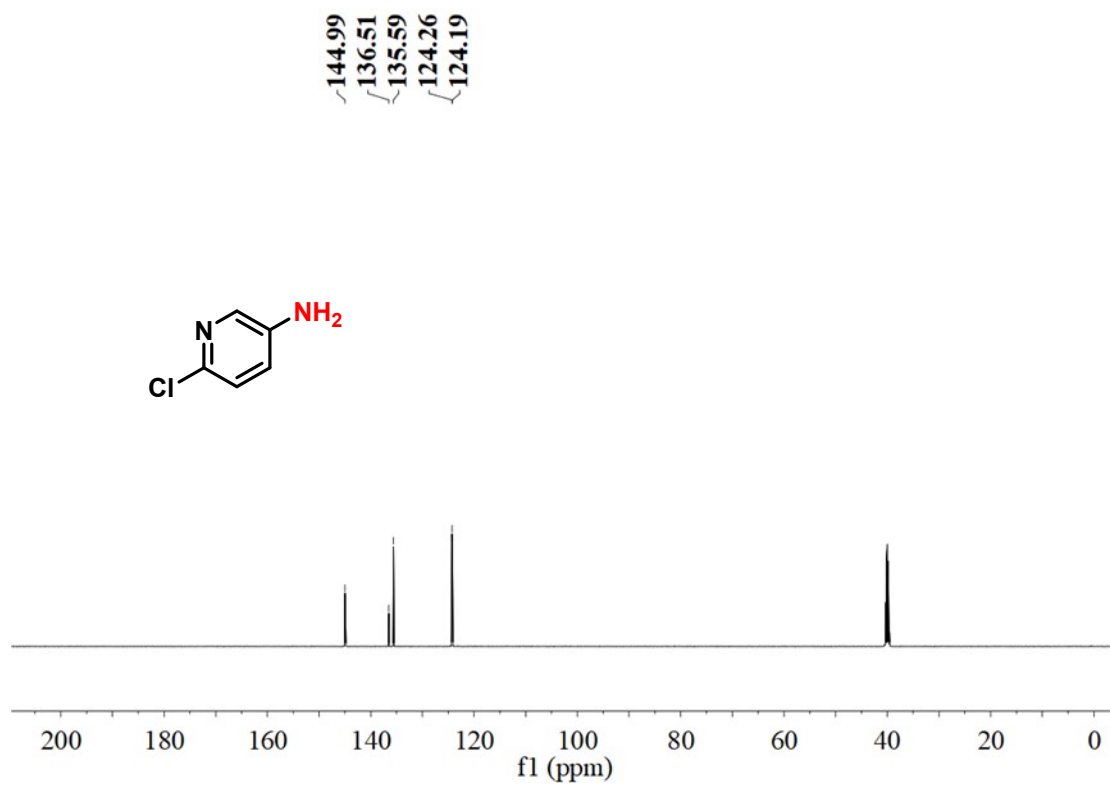



2s <sup>1</sup>H NMR

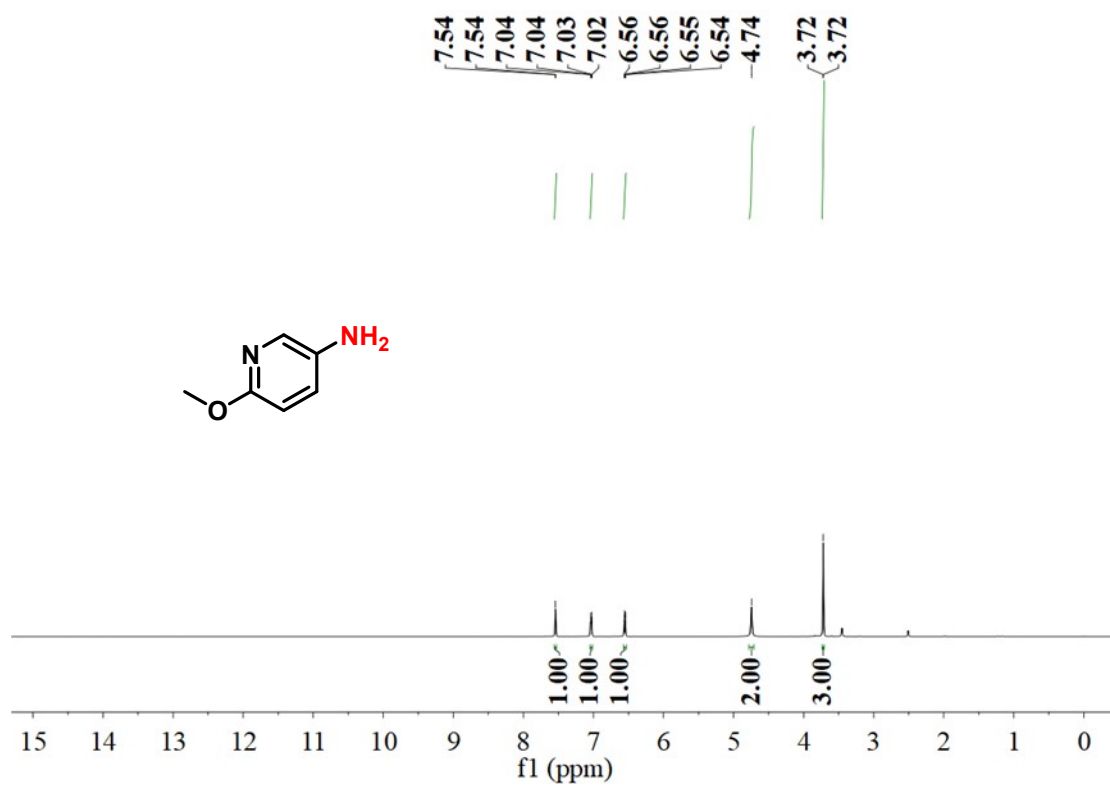

2s <sup>13</sup>C NMR

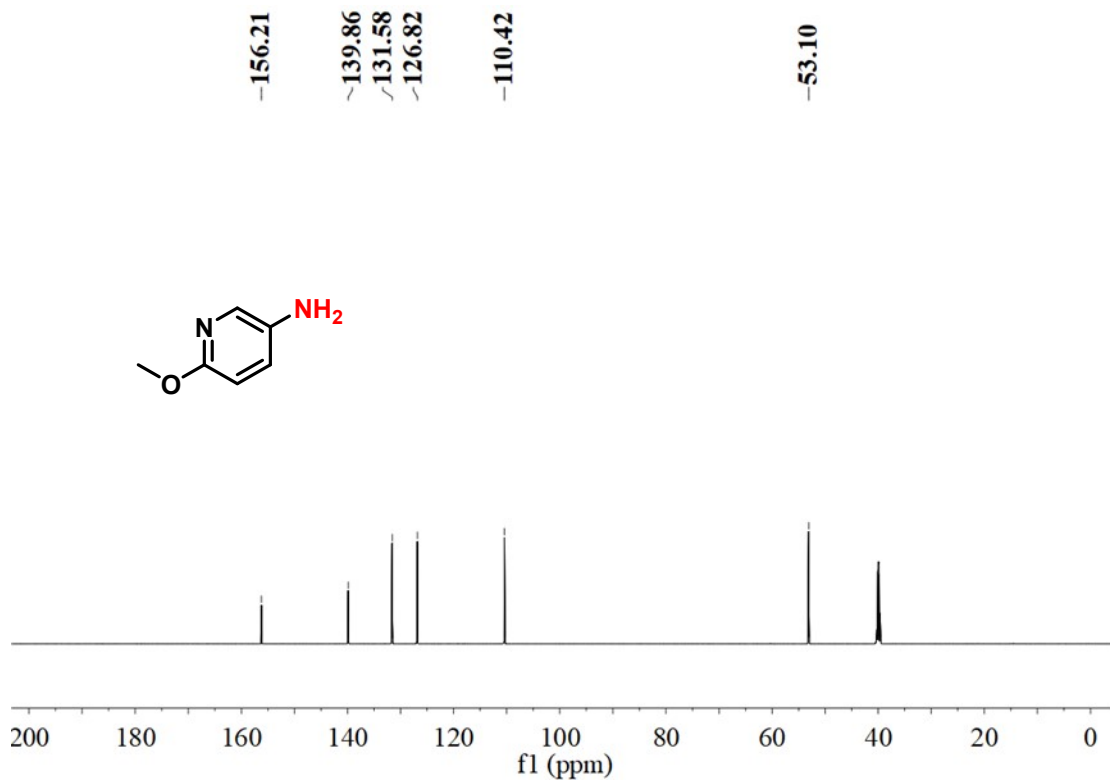

### 2t <sup>1</sup>H NMR

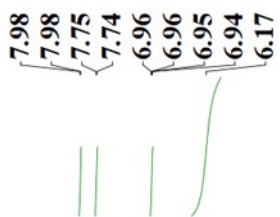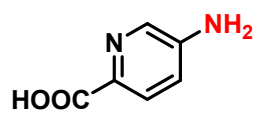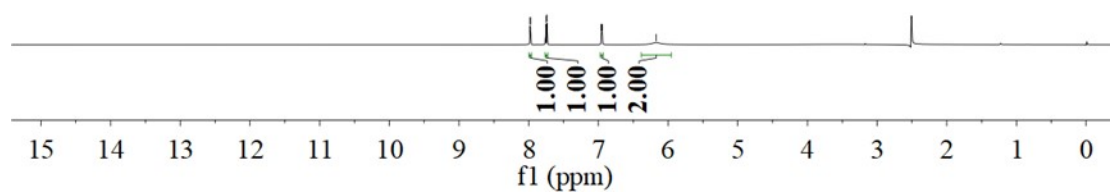

### 2t <sup>13</sup>C NMR

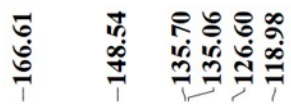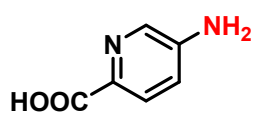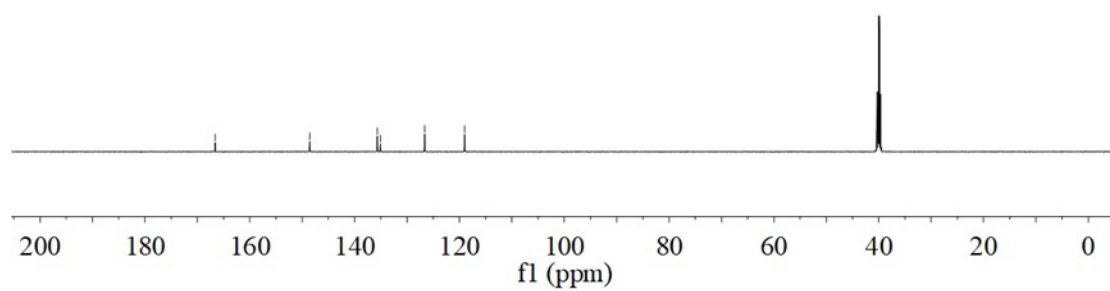

2f <sup>1</sup>H NMR

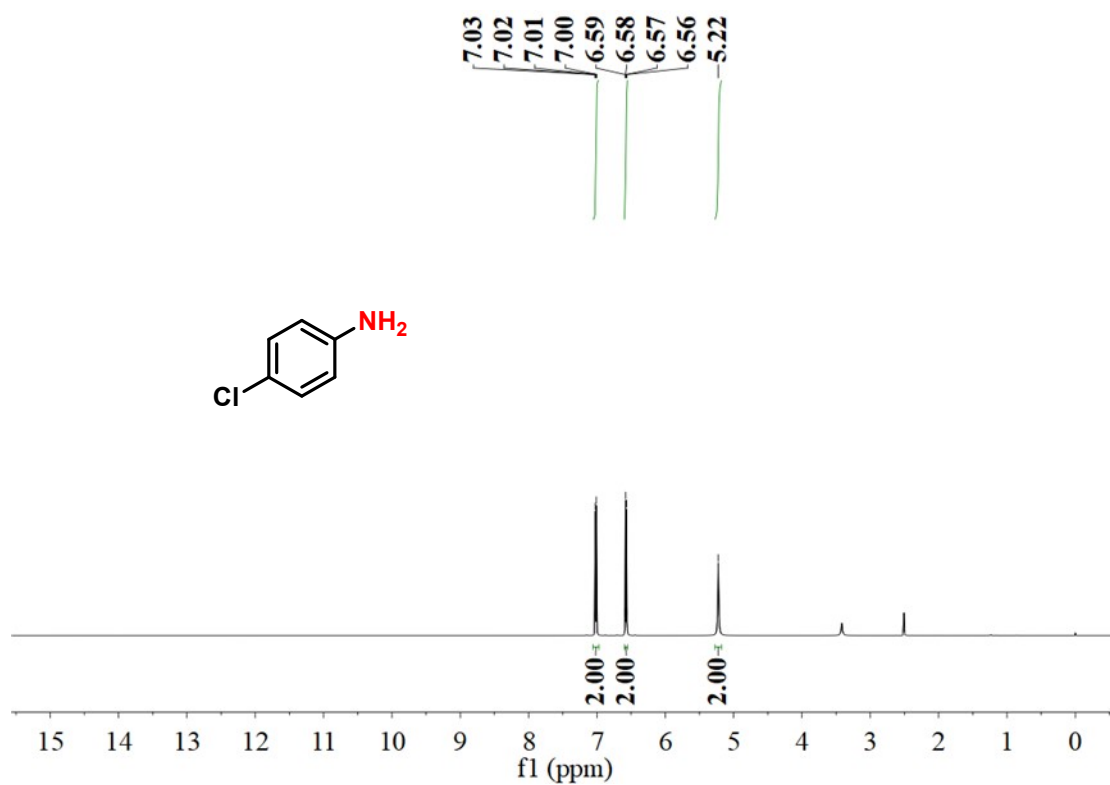

2f <sup>13</sup>C NMR

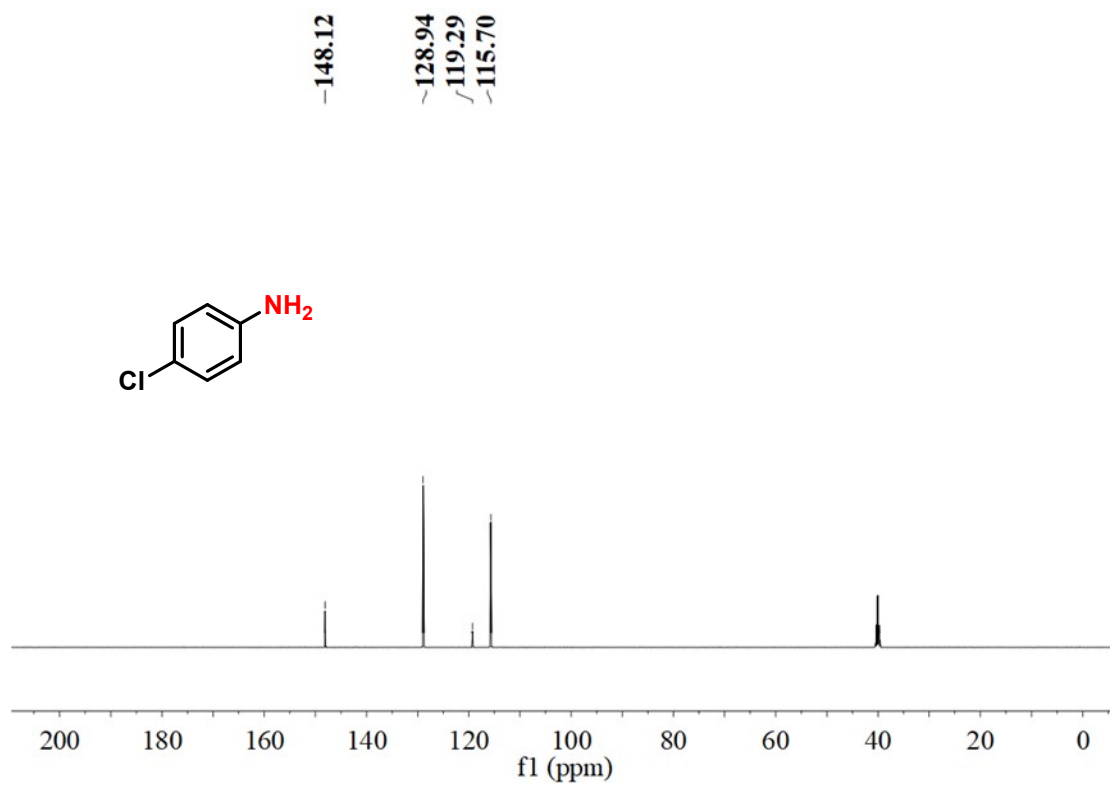

## References

- 1 J. F. Liang, X. M. Zhang, L. Y. Jing and H. Q. Yang, *Chin. J. Catal.*, 2017, **38**, 1252-1260.
- 2 K. J. Li, R. X. Qin, K. L. Liu, W. T. Zhou, N. Liu, Y. Z. Zhang, S. J. Liu, J. Chen, G. Fu and N. F. Zheng, *ACS Appl. Mater. Interfaces*, 2021, **13**, 52193-52201.
- 3 W. J. Yu, L. L. Lou, S. S. Li, T. Y. Ma, L. Z. Ouyang, L. Feng and S. X. Liu, *RSC Adv.*, 2017, **7**, 751-757.
- 4 W. C. Du, S. X. Xia, R. F. Nie and Z. Y. Hou, *Ind. Eng. Chem. Res.*, 2014, **53**, 4589-4594.
- 5 S. Iihama, S. Furukawa and T. Komatsu, *ACS Catal.*, 2016, **6**, 742-746.
- 6 W. Shi, B. S. Zhang, Y. M. Lin, Q. Wang, Q. Zhang and D. S. Su, *ACS Catal.*, 2016, **6**, 7844-7854.
- 7 W. M. Xu, K. J. Chai, Y. W. Jiang, J. B. Mao, J. Wang, P. F. Zhang and Y. F. Shi, *ACS Appl. Mater. Interfaces*, 2019, **11**, 17670-17677.
- 8 H. Zhang, X. C. Zhang, Q. D. Sun, Q. He, H. B. Ji and X. H. He, *Chem. Eng. J.*, 2023, **455**, 140808.
- 9 L. Huang, F. Y. Tang, F. Hao, H. Zhao, W. Y. Liu, Y. Lv, P. L. Liu, W. Xiong and H. A. Luo, *ACS Sustainable Chem. Eng.*, 2022, **10**, 2947-2959.
- 10 L. H. Zhu, Y. L. Sun, H. Z. Zhu, G. L. Chai, Z. Q. Yang, C. X. Shang, H. Q. Ye, B. H. Chen, A. Kroner and Z. X. Guo, *ACS Catal.*, 2022, **12**, 8104-8115.
- 11 S. Wang, S. H. Li, H. Y. Feng, W. Q. Yang and Y. S. Feng, *ACS Appl. Mater. Interfaces*, 2023, **15**, 4845-4856.
- 12 Z. H. Qu, X. Chen, S. Zhong, G. J. Deng and H. W. Huang, *Org. Lett.*, 2021, **23**, 5349-5353.
- 13 J. R. Morse, J. F. Callejas, A. J. Darling and R. E. Schaak, *Chem. Commun.*, 2017, **53**, 4807-4810.
- 14 G. Y. Song, D. Z. Nong, Q. Li, Y. G. Yan, G. Li, J. Fan, W. Zhang, R. Cao, C. Wang, J. L. Xiao and D. Xue, *ACS Catal.*, 2022, **12**, 15590-15599.
- 15 S. Y. Hong and A. T. Radosevich, *J. Am. Chem. Soc.*, 2022, **144**, 8902-8907.
- 16 J. B. Chang, J. H. Hwang, J. S. Park and J. P. Kim, *Dyes Pigm.*, 2011, **88**, 366-371.
